# Supplementary material
Source: PubMed Central journal article supplement (PMC6587923)
Supplement: cvy277_supplementary_material.pdf [file cvy277_supplementary_material.pdf]

Supplementary Material

**Fetal Hypoxia Impacts Methylome and Transcriptome in Developmental Programming of  
Heart Disease**

Lei Huang<sup>1, #</sup>, Xin Chen<sup>2, #</sup>, Chiranjib Dasgupta<sup>1</sup>, Wanqiu Chen<sup>2</sup>, Rui Song<sup>1</sup>, Charles Wang<sup>2, \*</sup>  
and Lubo Zhang<sup>1, \*</sup>

<sup>1</sup>Lawrence D. Longo, MD Center for Perinatal Biology, <sup>2</sup>Center for Genomics, Department of  
Basic Sciences, Loma Linda University School of Medicine, Loma Linda, California 92350,  
USA

**Supplementary materials include:**

Supplementary Figure 1. Experimental Design

Supplementary Figure 2. Scatterplots of ERCC log<sub>2</sub> [FPKM] vs. log<sub>2</sub> (spike-in concentration)

Supplementary Table 1. List of qPCR primers

Supplementary Table 2. List of primers for detecting gene promoter methylation

Supplementary Table 3. Summary of DNAm RRBS Detection

Supplementary Table 4. Summary of RNA-seq alignment and mapping

Supplementary Table 5. Summary of RNA-seq mapping exon vs. intron

Supplementary Table 6. Summary of DEGs

Supplementary Table 7. Summary of DMRs on start region of chromosome 13 that only  
hypomethylated in fetal rats

Supplementary Data 1. Summary of enriched pathways after antenatal hypoxia exposure

Supplementary Data 2. Summary of the detailed DNA methylation status and the corresponding  
gene expression for the overlapping DMRs and DEGs

## Supplementary Figure 1

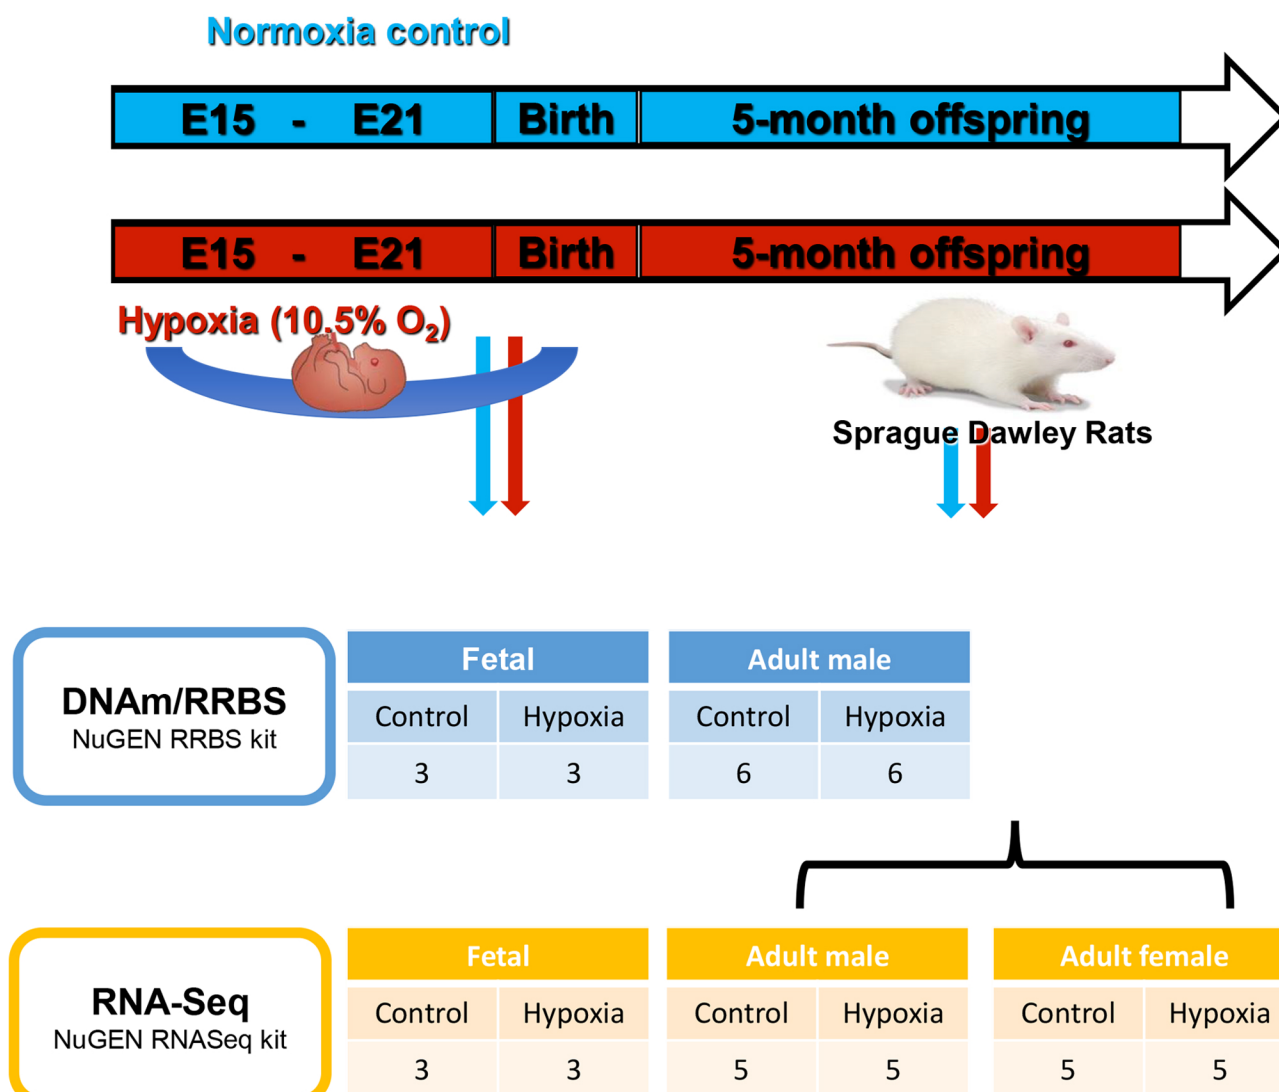

## Supplementary Figure 2

## Fetal samples

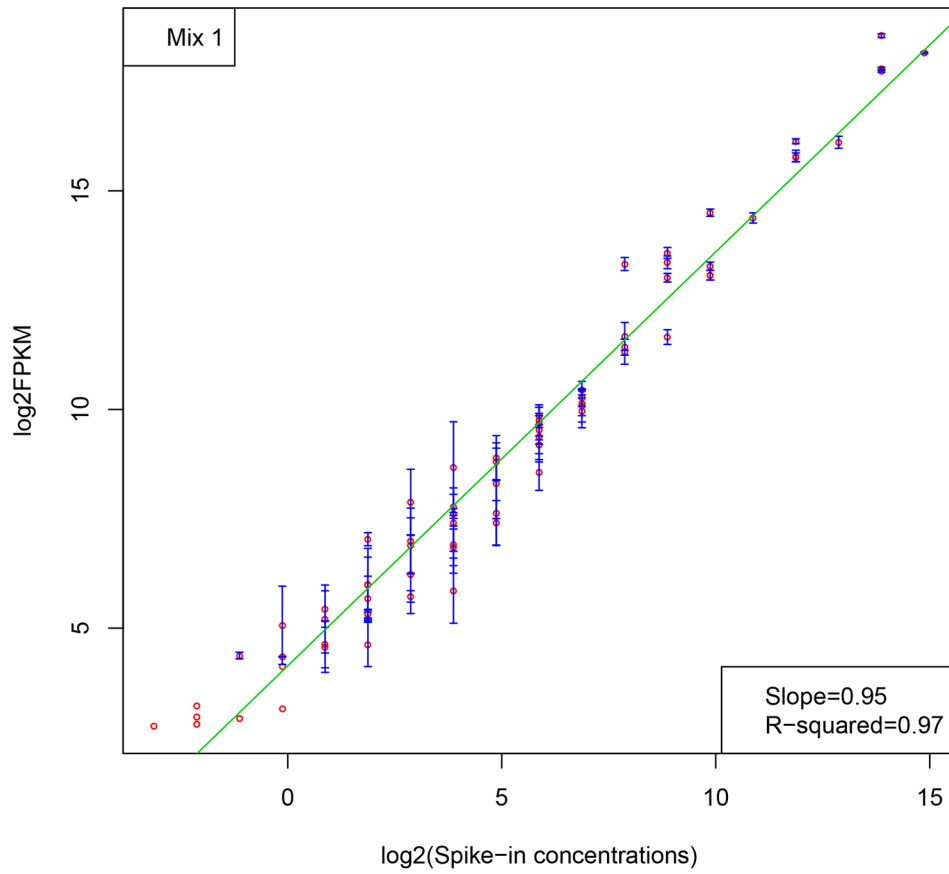

## Adult samples

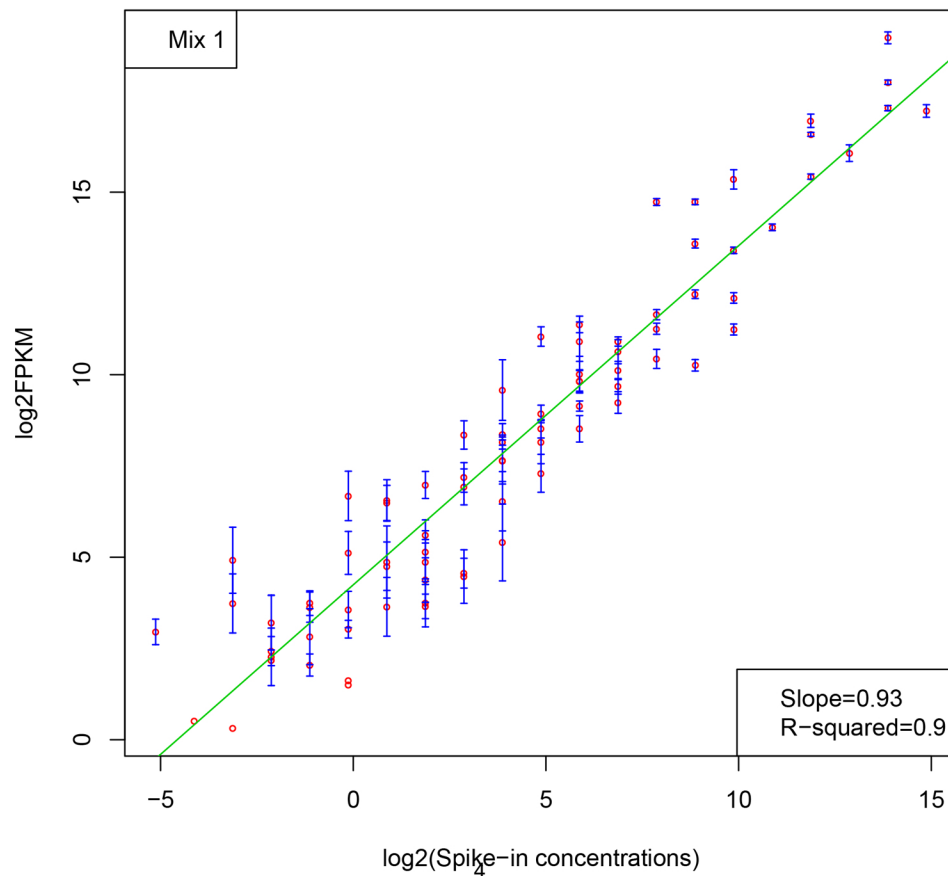

Supplementary Table 1. Summary of QPCR primers

| <b>Gene</b>                     | <b>Primer</b>                                                            |
|---------------------------------|--------------------------------------------------------------------------|
| <i>Hand-1</i>                   | Forward: 5'-GCTGCCTATGGTCCCGATG<br>Reverse: 5'-CTCCGCTCCTTTTTGGGTCC      |
| <i>HK-2</i>                     | Forward: 5'-GCCCACTTACGTGTGTGCCA<br>Reverse: 5'-CATTACGCACACGCACCAGC     |
| <i>Lcn2</i>                     | Forward: 5'-ATTCGTTCCAAGCTCCAGGC<br>Reverse: 5'-CTGGTCGTAGTCAGTGTCGG     |
| <i>Ddit4</i>                    | Forward: 5'-TCTTGTCCGCAATCTTCGCT<br>Reverse: 5'-GGAGGACGAGAAACGATCCC     |
| <i><math>\beta</math>-actin</i> | Forward: 5'-TCAGGTCATCACTATCGGCAAT<br>Reverse: 5'-ACTGTGTTGGCATAGAGGTCTT |

## Supplementary Table 2

## Summary of primers for detecting gene promoter Methylation

| <b>Gene</b>   | <b>Primers flanking gene promoters</b>                                                                                                                                                                                                                                                                                                                                       |
|---------------|------------------------------------------------------------------------------------------------------------------------------------------------------------------------------------------------------------------------------------------------------------------------------------------------------------------------------------------------------------------------------|
| <i>Hand-1</i> | <p>Zone1 primers (closest):<br/>           Forward: 5'-GGTTCAGTGCAGGGCGTGAG<br/>           Reverse: 5'-TTAACCCCTTCTGCGGACTTG</p> <p>Zone 2 primers:<br/>           Forward: 5'-GGAAGCGCTCTCCCATTTC<br/>           Reverse: 5'-CTTCCCGAATCCGAATTTTA</p> <p>Zone 3 primers:<br/>           Forward: 5'- GATTTTCATGCAGGTGGTGA<br/>           Reverse: 5'- CACTGACCGGTTTGTTC</p> |
| <i>HK-2</i>   | <p>Zone1 primers (Closest):<br/>           Forward: 5'-CGGAGTTATCCCGCTTAGG<br/>           Reverse: 5'-GGCACCTAAGTCTCACTCCTG</p> <p>Zone2 primers:<br/>           Forward: 5'-CGGAACACACGTCCCAACTCT<br/>           Reverse: 5'-GCCGCCCAAGACAGTGAC</p> <p>Zone3 primers:<br/>           Forward: 5'-ATACCAGATTGTGGCGTGTG<br/>           Reverse: 5'- AGAGTTGGGACGTGTGTTCC</p>  |
| <i>Lcn2</i>   | <p>Zone1 primers:<br/>           Forward: 5'-CCCGTCCTCACCTCTCCAGAC<br/>           Reverse: 5'-GAACGGGGGAGCTGAAGGG</p> <p>Zone2 primers:<br/>           Forward: 5'-TTTTTTCGGAGCTGGGGACC<br/>           Reverse: 5'-CACACGGTCCTTAGAATACAG</p> <p>Zone3 primers:<br/>           Forward: 5'-G TTCAGATGCGGATTCTGAGG<br/>           Reverse: 5'-CAGCCTAGGGCTGAAGAAAA</p>         |
| <i>Ddit4</i>  | <p>Zone1 primers:<br/>           Forward: 5'- CTTCCAGAAAGGGGGTGTG<br/>           Reverse: 5'- GCTGTGATCCCTAGCACCAG</p> <p>Zone 2 primers:</p>                                                                                                                                                                                                                                |

Forward: 5'-TCCTGGGACAACGGAGTAAC  
Reverse: 5'-TTTCAGCAGCTGCCAAGGT

Zone 3 primers:

Forward: 5'-AGGCGCTATGAATCGGAGT  
Reverse: 5'-ACTGTCTTTGCTGGGGACAC

*$\beta$ -actin*

Forward: 5'-TCCTGCACTCCCAATGGTTG  
Reverse: 5'-GCAAACGCTGCCTGTCAATA

---

**Supplementary Table 3**  
**Summary of DNAm\_RRBS\_Detection**

| Sample ID | Index seq | Tissue      | Raw reads  | Reads after trimming | Aligned reads | Aligned perct | CpGs with > 10 coverage | Overlapping CpGs | CpG regions with > 20 coverage | Overlapping CpG regions |
|-----------|-----------|-------------|------------|----------------------|---------------|---------------|-------------------------|------------------|--------------------------------|-------------------------|
| C1_6      | AACCAG    | Fetal Heart | 26,695,840 | 26,072,950           | 18,650,283    | 69.86%        | 973,090                 |                  | 231,354                        |                         |
| C2_11     | GTCGTA    | Fetal Heart | 40,972,629 | 40,226,777           | 28,800,878    | 70.29%        | 1,242,160               |                  | 244,819                        |                         |
| C3_6      | GGAGAA    | Fetal Heart | 25,062,167 | 24,535,588           | 17,498,561    | 69.82%        | 972,292                 | 590,422          | 230,393                        | 196,513                 |
| H3_1      | CGTAGA    | Fetal Heart | 37,561,432 | 36,775,870           | 26,769,528    | 71.27%        | 1,194,791               |                  | 239,878                        |                         |
| H3_2      | TCAGAG    | Fetal Heart | 25,559,679 | 25,089,677           | 18,294,745    | 71.58%        | 1,023,597               |                  | 232,377                        |                         |
| H5_3      | TGGTGA    | Fetal Heart | 23,394,623 | 22,889,181           | 16,601,333    | 70.96%        | 952,553                 |                  | 223,142                        |                         |
| C1        | AACCAG    | Adult Heart | 17,135,032 | 16,547,962           | 11,768,295    | 68.68%        | 884,322                 |                  | 203,101                        |                         |
| C2        | TGGTGA    | Adult Heart | 24,241,632 | 22,878,966           | 16,140,595    | 66.58%        | 1,092,544               |                  | 211,651                        |                         |
| C3        | AGTGAG    | Adult Heart | 27,852,951 | 26,808,469           | 17,960,090    | 64.48%        | 1,126,651               |                  | 222,460                        |                         |
| C4        | GCACTA    | Adult Heart | 20,749,563 | 19,790,419           | 14,118,473    | 68.04%        | 1,011,999               |                  | 212,544                        |                         |
| C5        | GTGCTT    | Adult Heart | 20,952,710 | 20,083,927           | 14,113,801    | 67.36%        | 1,007,384               |                  | 212,444                        |                         |
| C6        | AAGCCT    | Adult Heart | 14,990,291 | 14,371,737           | 9,900,370     | 66.05%        | 725,525                 | 454,882          | 198,606                        | 176,402                 |
| H1        | GTCGTA    | Adult Heart | 25,712,725 | 24,632,094           | 17,627,567    | 68.56%        | 1,119,762               |                  | 229,018                        |                         |
| H2        | AAGAGG    | Adult Heart | 22,462,655 | 21,585,728           | 15,623,008    | 69.55%        | 1,071,396               |                  | 217,772                        |                         |
| H3        | GAGTCA    | Adult Heart | 23,291,226 | 22,413,728           | 16,050,808    | 68.91%        | 1,071,479               |                  | 218,135                        |                         |
| H4        | CGTAGA    | Adult Heart | 21,582,884 | 20,780,342           | 14,874,035    | 68.92%        | 1,028,367               |                  | 212,191                        |                         |
| H5        | CACAGT    | Adult Heart | 26,982,687 | 25,777,219           | 18,327,452    | 67.92%        | 1,164,827               |                  | 222,064                        |                         |
| H6        | TTGGCA    | Adult Heart | 23,910,340 | 23,121,304           | 16,521,401    | 69.10%        | 1,090,146               |                  | 219,834                        |                         |
| Average   |           |             | 24,950,615 | 24,132,330           | 17,202,290    | 68.77%        | 1,041,827               |                  | 221,210                        |                         |



**Supplementary Table 4**  
**Summary of RNA-seq alignment and mapping**

| Sample | Status  | Gender       | Tissue | Raw reads  | Total left reads | Aligned left reads | Total right reads | Aligned right reads | Total aligned pair-reads | ERCC aligned pair-reads | Total aligned reads | Overall alignment rate | ERCC alignment rate | PE   |
|--------|---------|--------------|--------|------------|------------------|--------------------|-------------------|---------------------|--------------------------|-------------------------|---------------------|------------------------|---------------------|------|
| C1-6   | Control | Fetal        | Heart  | 34,895,230 | 15,163,134       | 13,769,068         | 15,163,134        | 13,449,185          | 12,632,742               | 24,415                  | 27,218,253          | 89.75%                 | 0.16%               | 75X2 |
| C2-11  | Control | Fetal        | Heart  | 38,601,636 | 16,940,751       | 15,331,154         | 16,940,751        | 15,018,240          | 14,075,483               | 26,132                  | 30,349,394          | 89.58%                 | 0.15%               | 75X2 |
| C3-6   | Control | Fetal        | Heart  | 42,102,084 | 17,800,708       | 16,072,424         | 17,800,708        | 15,613,963          | 14,642,669               | 26,028                  | 31,686,387          | 89.00%                 | 0.15%               | 75X2 |
| H3-1   | Hypoxia | Fetal        | Heart  | 38,231,532 | 16,311,619       | 14,617,320         | 16,311,619        | 14,286,925          | 13,323,978               | 26,657                  | 28,904,245          | 88.60%                 | 0.16%               | 75X2 |
| H3-2   | Hypoxia | Fetal        | Heart  | 36,522,906 | 15,711,724       | 14,257,256         | 15,711,724        | 13,804,763          | 12,971,552               | 22,875                  | 28,062,019          | 89.30%                 | 0.15%               | 75X2 |
| H5-3   | Hypoxia | Fetal        | Heart  | 36,385,396 | 15,575,172       | 14,041,426         | 15,575,172        | 13,675,676          | 12,801,716               | 22,879                  | 27,717,102          | 88.98%                 | 0.15%               | 75X2 |
| MC3    | Control | Adult Male   | Heart  | 58,185,428 | 27,146,977       | 26,172,144         | 27,146,977        | 25,012,103          | 24,465,642               | 80,423                  | 51,184,247          | 94.27%                 | 0.30%               | 75X2 |
| MC4    | Control | Adult Male   | Heart  | 56,634,526 | 26,508,245       | 25,528,656         | 26,508,245        | 24,523,356          | 23,980,726               | 88,808                  | 50,052,012          | 94.41%                 | 0.34%               | 75X2 |
| MC7    | Control | Adult Male   | Heart  | 54,916,406 | 25,886,059       | 24,877,868         | 25,886,059        | 23,949,445          | 23,386,792               | 87,580                  | 48,827,313          | 94.31%                 | 0.34%               | 75X2 |
| MC8    | Control | Adult Male   | Heart  | 56,003,054 | 26,287,945       | 25,173,210         | 26,287,945        | 24,275,411          | 23,652,439               | 81,751                  | 49,448,621          | 94.05%                 | 0.31%               | 75X2 |
| MC9    | Control | Adult Male   | Heart  | 58,968,558 | 27,655,885       | 26,052,099         | 27,655,885        | 25,289,436          | 24,446,787               | 67,829                  | 51,341,535          | 92.82%                 | 0.25%               | 75X2 |
| MH1    | Hypoxia | Adult Male   | Heart  | 55,039,114 | 25,775,880       | 24,831,468         | 25,775,880        | 23,901,996          | 23,358,079               | 77,021                  | 48,733,464          | 94.53%                 | 0.30%               | 75X2 |
| MH2    | Hypoxia | Adult Male   | Heart  | 47,634,206 | 22,316,457       | 21,383,592         | 22,316,457        | 20,565,900          | 20,049,445               | 79,958                  | 41,949,492          | 93.99%                 | 0.36%               | 75X2 |
| MH4    | Hypoxia | Adult Male   | Heart  | 54,297,082 | 25,500,117       | 24,524,929         | 25,500,117        | 23,690,788          | 23,164,253               | 97,318                  | 48,215,717          | 94.54%                 | 0.38%               | 75X2 |
| MH9    | Hypoxia | Adult Male   | Heart  | 54,888,454 | 25,830,422       | 24,377,736         | 25,830,422        | 23,746,863          | 22,979,753               | 79,612                  | 48,124,599          | 93.15%                 | 0.31%               | 75X2 |
| MH10   | Hypoxia | Adult Male   | Heart  | 53,089,986 | 24,844,176       | 23,757,890         | 24,844,176        | 22,880,421          | 22,312,129               | 101,802                 | 46,638,311          | 93.86%                 | 0.41%               | 75X2 |
| FC3    | Control | Adult Female | Heart  | 53,455,590 | 24,919,293       | 23,962,328         | 24,919,293        | 23,013,270          | 22,544,086               | 112,624                 | 46,975,598          | 94.26%                 | 0.45%               | 75X2 |
| FC4    | Control | Adult Female | Heart  | 53,071,534 | 24,887,935       | 23,938,056         | 24,887,935        | 23,066,979          | 22,567,301               | 119,016                 | 47,005,035          | 94.43%                 | 0.48%               | 75X2 |
| FC5    | Control | Adult Female | Heart  | 53,203,616 | 24,891,294       | 24,019,361         | 24,891,294        | 22,998,780          | 22,530,308               | 95,103                  | 47,018,141          | 94.45%                 | 0.38%               | 75X2 |
| FC6    | Control | Adult Female | Heart  | 48,201,600 | 22,630,312       | 21,745,871         | 22,630,312        | 20,955,932          | 20,484,946               | 80,985                  | 42,701,803          | 94.35%                 | 0.36%               | 75X2 |
| FC7    | Control | Adult Female | Heart  | 55,741,566 | 26,060,937       | 25,041,431         | 26,060,937        | 24,048,345          | 23,514,484               | 102,117                 | 49,089,776          | 94.18%                 | 0.39%               | 75X2 |
| FH3    | Hypoxia | Adult Female | Heart  | 52,662,140 | 24,638,573       | 23,666,762         | 24,638,573        | 22,722,741          | 22,200,329               | 99,233                  | 46,389,503          | 94.14%                 | 0.40%               | 75X2 |
| FH4    | Hypoxia | Adult Female | Heart  | 54,616,484 | 25,471,144       | 23,917,729         | 25,471,144        | 22,973,636          | 22,476,673               | 130,593                 | 46,891,365          | 92.05%                 | 0.51%               | 75X2 |
| FH6    | Hypoxia | Adult Female | Heart  | 53,757,798 | 25,197,459       | 24,160,510         | 25,197,459        | 23,261,378          | 22,737,527               | 97,404                  | 47,421,888          | 94.10%                 | 0.39%               | 75X2 |
| FH7    | Hypoxia | Adult Female | Heart  | 52,364,530 | 24,467,653       | 23,464,740         | 24,467,653        | 22,444,107          | 21,929,771               | 81,867                  | 45,908,847          | 93.82%                 | 0.33%               | 75X2 |
| FH9    | Hypoxia | Adult Female | Heart  | 55,678,614 | 26,017,403       | 25,021,310         | 26,017,403        | 24,081,985          | 23,550,297               | 100,505                 | 49,103,295          | 94.37%                 | 0.39%               | 75X2 |

**Supplementary Table 5**  
**Summary of RNA-seq mapping exon vs. intron**

| Sample | Status  | Gender       | Tissue | Exon tags  | Intron tags | Intergenic tags | Total tags | Exon percentage | Intron percentage | Intergenic percentage |
|--------|---------|--------------|--------|------------|-------------|-----------------|------------|-----------------|-------------------|-----------------------|
| C1-6   | Control | Fetal        | Heart  | 11,837,257 | 9,438,569   | 9,311,196       | 30,587,022 | 38.70%          | 30.86%            | 30.45%                |
| C2-11  | Control | Fetal        | Heart  | 12,975,563 | 10,637,152  | 10,338,889      | 33,951,604 | 38.22%          | 31.33%            | 30.45%                |
| C3-6   | Control | Fetal        | Heart  | 13,425,082 | 11,225,932  | 10,874,333      | 35,525,347 | 37.79%          | 31.60%            | 30.61%                |
| H3-1   | Hypoxia | Fetal        | Heart  | 12,487,854 | 9,954,696   | 10,082,572      | 32,525,122 | 38.39%          | 30.61%            | 30.99%                |
| H3-2   | Hypoxia | Fetal        | Heart  | 12,224,402 | 9,548,513   | 9,839,169       | 31,612,084 | 38.67%          | 30.21%            | 31.13%                |
| H5-3   | Hypoxia | Fetal        | Heart  | 11,819,344 | 9,670,116   | 9,652,034       | 31,141,494 | 37.95%          | 31.05%            | 30.99%                |
| MC3    | Control | Adult Male   | Heart  | 18,676,546 | 9,601,185   | 28,675,568      | 56,953,299 | 32.79%          | 16.86%            | 50.35%                |
| MC4    | Control | Adult Male   | Heart  | 17,277,947 | 9,463,379   | 28,794,435      | 55,535,761 | 31.11%          | 17.04%            | 51.85%                |
| MC7    | Control | Adult Male   | Heart  | 15,081,614 | 7,774,114   | 30,752,134      | 53,607,862 | 28.13%          | 14.50%            | 57.37%                |
| MC8    | Control | Adult Male   | Heart  | 14,144,617 | 7,779,500   | 32,108,022      | 54,032,139 | 26.18%          | 14.40%            | 59.42%                |
| MC9    | Control | Adult Male   | Heart  | 10,467,152 | 9,442,438   | 34,975,049      | 54,884,639 | 19.07%          | 17.20%            | 63.72%                |
| MH1    | Hypoxia | Adult Male   | Heart  | 17,431,283 | 8,143,839   | 28,650,801      | 54,225,923 | 32.15%          | 15.02%            | 52.84%                |
| MH2    | Hypoxia | Adult Male   | Heart  | 14,286,966 | 7,643,146   | 24,491,416      | 46,421,528 | 30.78%          | 16.46%            | 52.76%                |
| MH4    | Hypoxia | Adult Male   | Heart  | 16,199,137 | 9,366,682   | 27,915,632      | 53,481,451 | 30.29%          | 17.51%            | 52.19%                |
| MH9    | Hypoxia | Adult Male   | Heart  | 10,807,650 | 9,169,091   | 31,670,963      | 51,647,704 | 20.93%          | 17.75%            | 61.32%                |
| MH10   | Hypoxia | Adult Male   | Heart  | 15,288,364 | 8,618,844   | 27,556,472      | 51,463,680 | 29.71%          | 16.75%            | 53.55%                |
| FC3    | Control | Adult Female | Heart  | 17,183,896 | 9,758,646   | 25,729,734      | 52,672,276 | 32.62%          | 18.53%            | 48.85%                |
| FC4    | Control | Adult Female | Heart  | 16,571,902 | 8,369,644   | 27,378,648      | 52,320,194 | 31.67%          | 16.00%            | 52.33%                |
| FC5    | Control | Adult Female | Heart  | 16,226,658 | 7,589,398   | 28,367,320      | 52,183,376 | 31.10%          | 14.54%            | 54.36%                |
| FC6    | Control | Adult Female | Heart  | 15,947,981 | 7,731,388   | 24,077,695      | 47,757,064 | 33.39%          | 16.19%            | 50.42%                |
| FC7    | Control | Adult Female | Heart  | 17,602,574 | 9,135,015   | 28,140,983      | 54,878,572 | 32.08%          | 16.65%            | 51.28%                |
| FH3    | Hypoxia | Adult Female | Heart  | 15,882,877 | 7,905,536   | 27,657,057      | 51,445,470 | 30.87%          | 15.37%            | 53.76%                |
| FH4    | Hypoxia | Adult Female | Heart  | 15,399,969 | 11,294,819  | 25,054,700      | 51,749,488 | 29.76%          | 21.83%            | 48.41%                |
| FH6    | Hypoxia | Adult Female | Heart  | 18,114,350 | 9,322,518   | 25,710,964      | 53,147,832 | 34.08%          | 17.54%            | 48.38%                |
| FH7    | Hypoxia | Adult Female | Heart  | 14,773,626 | 7,187,023   | 28,700,414      | 50,661,063 | 29.16%          | 14.19%            | 56.66%                |
| FH9    | Hypoxia | Adult Female | Heart  | 17,806,738 | 9,535,843   | 27,489,354      | 54,831,935 | 32.48%          | 17.39%            | 50.13%                |

Supplementary Table 6  
Summary of DEGs

| Gene         | Locus    | Fetus         |               |               |               |           |           |         |             | Adult Male |         |          |           |           |         | Adult Female  |      |         |         |           |           |         |         |      |   |
|--------------|----------|---------------|---------------|---------------|---------------|-----------|-----------|---------|-------------|------------|---------|----------|-----------|-----------|---------|---------------|------|---------|---------|-----------|-----------|---------|---------|------|---|
|              |          | Value_1:      |               | Value_2:      |               | log2.fold | Test_stat | p_value | q_value     | Indc       | Value_1 | Value_2  | log2.fold | Test_stat | p_value | q_value       | Indc | Value_1 | Value_2 | log2.fold | Test_stat | p_value | q_value | Indc |   |
|              |          | control group | Hypoxic group | control group | Hypoxic group |           |           |         |             |            |         |          |           |           |         |               |      |         |         |           |           |         |         |      |   |
| LOC100360791 | 1:201115 | 14.4466       | 101.607       | 2.81419       | 10.1536       | 0.00005   | 0.00828   | U       | up-regulate | 40.0996    | 101.242 | 1.33615  | 3.39223   | 0.00005   | 0.01217 | U             | NA   | NA      | NA      | NA        | NA        | NA      | NA      | NA   | M |
| Ephx2        | 15:42757 | 2.25683       | 10.654        | 2.23903       | 6.19421       | 0.00005   | 0.00828   | U       |             | NA         | NA      | NA       | NA        | NA        | NA      | Maintain      | NA   | NA      | NA      | NA        | NA        | NA      | NA      | NA   | M |
| Fam111a      | 1:229003 | 57.4851       | 165.546       | 1.52597       | 6.34607       | 0.00005   | 0.00828   | U       |             | 17.9964    | 44.4369 | 1.30405  | 3.1222    | 0.00005   | 0.01217 | U             | NA   | NA      | NA      | NA        | NA        | NA      | NA      | NA   | M |
| Xirp2        | 3:535632 | 2.50414       | 7.13189       | 1.50997       | 7.27454       | 0.00005   | 0.00828   | U       |             | NA         | NA      | NA       | NA        | NA        | NA      | M             | NA   | NA      | NA      | NA        | NA        | NA      | NA      | NA   | M |
| LOC103693813 | 15:40918 | 2.39277       | 6.13568       | 1.35855       | 1.94254       | 0.0042    | 0.20741   | U       |             | NA         | NA      | NA       | NA        | NA        | NA      | M             | NA   | NA      | NA      | NA        | NA        | NA      | NA      | NA   | M |
| Myom2        | 16:79587 | 3.31042       | 7.67958       | 1.21401       | 5.00393       | 0.00005   | 0.00828   | U       |             | NA         | NA      | NA       | NA        | NA        | NA      | M             | NA   | NA      | NA      | NA        | NA        | NA      | NA      | NA   | M |
| Tesc         | 12:44141 | 40.108        | 85.7077       | 1.09554       | 5.16922       | 0.00005   | 0.00828   | U       |             | NA         | NA      | NA       | NA        | NA        | NA      | M             | NA   | NA      | NA      | NA        | NA        | NA      | NA      | NA   | M |
| Sgsh         | 10:10846 | 1.11089       | 2.33997       | 1.07477       | 1.91248       | 0.003     | 0.1733    | U       |             | NA         | NA      | NA       | NA        | NA        | NA      | M             | NA   | NA      | NA      | NA        | NA        | NA      | NA      | NA   | M |
| LOC684327    | 17:72035 | 1.14503       | 2.38471       | 1.05843       | 2.45941       | 0.00025   | 0.02942   | U       |             | NA         | NA      | NA       | NA        | NA        | NA      | M             | NA   | NA      | NA      | NA        | NA        | NA      | NA      | NA   | M |
| Nudt14       | 6:137738 | 2.18103       | 4.5402        | 1.05775       | 1.71994       | 0.00455   | 0.21786   | U       |             | NA         | NA      | NA       | NA        | NA        | NA      | M             | NA   | NA      | NA      | NA        | NA        | NA      | NA      | NA   | M |
| LOC103692175 | 4:115953 | 4.01507       | 8.02031       | 0.99823       | 2.69971       | 0.00005   | 0.00828   | U       |             | NA         | NA      | NA       | NA        | NA        | NA      | M             | NA   | NA      | NA      | NA        | NA        | NA      | NA      | NA   | M |
| Dstnl1       | 20:84491 | 3.80959       | 7.50956       | 0.9791        | 2.81554       | 0.00005   | 0.00828   | U       |             | NA         | NA      | NA       | NA        | NA        | NA      | M             | NA   | NA      | NA      | NA        | NA        | NA      | NA      | NA   | M |
| LOC100909598 | 8:797152 | 4.34921       | 8.4029        | 0.95014       | 1.56431       | 0.00795   | 0.29188   | U       |             | NA         | NA      | NA       | NA        | NA        | NA      | M             | NA   | NA      | NA      | NA        | NA        | NA      | NA      | NA   | M |
| Hbegf        | 18:29330 | 2.81831       | 5.28722       | 0.90768       | 2.33998       | 0.0002    | 0.02469   | U       |             | NA         | NA      | NA       | NA        | NA        | NA      | M             | NA   | NA      | NA      | NA        | NA        | NA      | NA      | NA   | M |
| Pak6         | 3:110442 | 1.60634       | 2.96211       | 0.88285       | 2.33703       | 0.00015   | 0.01889   | U       |             | NA         | NA      | NA       | NA        | NA        | NA      | M             | NA   | NA      | NA      | NA        | NA        | NA      | NA      | NA   | M |
| LOC102552863 | 1:176084 | 5.39543       | 9.86591       | 0.87072       | 2.81609       | 0.00005   | 0.00828   | U       |             | NA         | NA      | NA       | NA        | NA        | NA      | M             | NA   | NA      | NA      | NA        | NA        | NA      | NA      | NA   | M |
| Fdxacb1      | 8:551964 | 1.27358       | 2.32627       | 0.86912       | 1.86036       | 0.00105   | 0.08757   | U       |             | NA         | NA      | NA       | NA        | NA        | NA      | M             | NA   | NA      | NA      | NA        | NA        | NA      | NA      | NA   | M |
| Pibd1        | 4:170564 | 6.47135       | 11.6786       | 0.85173       | 3.17683       | 0.00005   | 0.00828   | U       |             | 77.5914    | 56.9182 | -0.44701 | -1.33764  | 0.0028    | 0.29856 | Down-regulate | NA   | NA      | NA      | NA        | NA        | NA      | NA      | NA   | M |
| Saal1        | 1:102738 | 1.98274       | 3.57759       | 0.85149       | 2.1103        | 0.0005    | 0.05119   | U       |             | NA         | NA      | NA       | NA        | NA        | NA      | M             | NA   | NA      | NA      | NA        | NA        | NA      | NA      | NA   | M |
| Rhbdl3       | 10:67677 | 1.58684       | 2.86254       | 0.85114       | 1.83486       | 0.00065   | 0.06248   | U       |             | NA         | NA      | NA       | NA        | NA        | NA      | M             | NA   | NA      | NA      | NA        | NA        | NA      | NA      | NA   | M |
| Ildr2        | 13:84474 | 2.95564       | 5.33096       | 0.85093       | 3.10613       | 0.00005   | 0.00828   | U       |             | NA         | NA      | NA       | NA        | NA        | NA      | M             | NA   | NA      | NA      | NA        | NA        | NA      | NA      | NA   | M |
| Pnma2        | 15:43581 | 2.94981       | 5.28128       | 0.84026       | 2.90139       | 0.00005   | 0.00828   | U       |             | NA         | NA      | NA       | NA        | NA        | NA      | M             | NA   | NA      | NA      | NA        | NA        | NA      | NA      | NA   | M |
| Uros         | 1:205755 | 2.03132       | 3.63117       | 0.83802       | 1.94011       | 0.0012    | 0.09687   | U       |             | NA         | NA      | NA       | NA        | NA        | NA      | M             | NA   | NA      | NA      | NA        | NA        | NA      | NA      | NA   | M |
| Asb15        | 4:515988 | 5.43868       | 9.70689       | 0.83575       | 3.06336       | 0.00005   | 0.00828   | U       |             | NA         | NA      | NA       | NA        | NA        | NA      | M             | NA   | NA      | NA      | NA        | NA        | NA      | NA      | NA   | M |
| Actr3b       | 4:564428 | 3.70247       | 6.56952       | 0.8273        | 2.02004       | 0.0004    | 0.04458   | U       |             | NA         | NA      | NA       | NA        | NA        | NA      | M             | NA   | NA      | NA      | NA        | NA        | NA      | NA      | NA   | M |
| Dlgap1       | 9:118586 | 3.95506       | 6.95253       | 0.81384       | 3.09967       | 0.00005   | 0.00828   | U       |             | NA         | NA      | NA       | NA        | NA        | NA      | M             | NA   | NA      | NA      | NA        | NA        | NA      | NA      | NA   | M |
| Dxo          | 20:45173 | 3.13055       | 5.43825       | 0.79673       | 2.01459       | 0.0007    | 0.06434   | U       |             | NA         | NA      | NA       | NA        | NA        | NA      | M             | NA   | NA      | NA      | NA        | NA        | NA      | NA      | NA   | M |
| Msln         | 10:15119 | 1.6421        | 2.84967       | 0.79525       | 1.79069       | 0.00185   | 0.13004   | U       |             | NA         | NA      | NA       | NA        | NA        | NA      | M             | NA   | NA      | NA      | NA        | NA        | NA      | NA      | NA   | M |
| LOC102551651 | 5:100296 | 2.50043       | 4.24345       | 0.76306       | 1.85759       | 0.00275   | 0.16491   | U       |             | NA         | NA      | NA       | NA        | NA        | NA      | M             | NA   | NA      | NA      | NA        | NA        | NA      | NA      | NA   | M |
| Ltpb2        | 6:108500 | 2.28981       | 3.88386       | 0.76227       | 3.01189       | 0.00005   | 0.00828   | U       |             | NA         | NA      | NA       | NA        | NA        | NA      | M             | NA   | NA      | NA      | NA        | NA        | NA      | NA      | NA   | M |
| Epha3        | 11:42125 | 2.96288       | 5.00911       | 0.75755       | 2.4318        | 0.00005   | 0.00828   | U       |             | NA         | NA      | NA       | NA        | NA        | NA      | M             | NA   | NA      | NA      | NA        | NA        | NA      | NA      | NA   | M |
| Scn1a        | 3:523888 | 2.64636       | 4.45035       | 0.74991       | 3.26547       | 0.00005   | 0.00828   | U       |             | NA         | NA      | NA       | NA        | NA        | NA      | M             | NA   | NA      | NA      | NA        | NA        | NA      | NA      | NA   | M |
| Parp3        | 8:115173 | 1.54438       | 2.59456       | 0.74846       | 1.62542       | 0.00415   | 0.20575   | U       |             | NA         | NA      | NA       | NA        | NA        | NA      | M             | NA   | NA      | NA      | NA        | NA        | NA      | NA      | NA   | M |
| Prrg4        | 3:947838 | 2.9511        | 4.93101       | 0.74063       | 2.05741       | 0.0009    | 0.07871   | U       |             | NA         | NA      | NA       | NA        | NA        | NA      | M             | NA   | NA      | NA      | NA        | NA        | NA      | NA      | NA   | M |
| Mfsd6        | 9:536255 | 4.45083       | 7.43221       | 0.73972       | 3.23135       | 0.00005   | 0.00828   | U       |             | NA         | NA      | NA       | NA        | NA        | NA      | M             | NA   | NA      | NA      | NA        | NA        | NA      | NA      | NA   | M |
| H3f3c        | 7:947776 | 17.5111       | 29.1217       | 0.73383       | 2.88965       | 0.00005   | 0.00828   | U       |             | NA         | NA      | NA       | NA        | NA        | NA      | M             | NA   | NA      | NA      | NA        | NA        | NA      | NA      | NA   | M |
| Akap5        | 6:993565 | 1.5109        | 2.50108       | 0.72714       | 1.82          | 0.0027    | 0.16426   | U       |             | NA         | NA      | NA       | NA        | NA        | NA      | M             | NA   | NA      | NA      | NA        | NA        | NA      | NA      | NA   | M |
| Atp6v1g2     | 20:48212 | 4.28686       | 7.04063       | 0.71578       | 1.60788       | 0.00785   | 0.29089   | U       |             | NA         | NA      | NA       | NA        | NA        | NA      | M             | NA   | NA      | NA      | NA        | NA        | NA      | NA      | NA   | M |
| LOC102550774 | 8:125545 | 1.01842       | 1.66302       | 0.70746       | 1.55906       | 0.00305   | 0.17459   | U       |             | NA         | NA      | NA       | NA        | NA        | NA      | M             | NA   | NA      | NA      | NA        | NA        | NA      | NA      | NA   | M |
| Oit3         | 20:29009 | 1.86563       | 3.04059       | 0.70469       | 1.78826       | 0.0028    | 0.16632   | U       |             | NA         | NA      | NA       | NA        | NA        | NA      | M             | NA   | NA      | NA      | NA        | NA        | NA      | NA      | NA   | M |
| Scn3b        | 8:441364 | 1.81082       | 2.92709       | 0.69283       | 1.63101       | 0.0037    | 0.19334   | U       |             | NA         | NA      | NA       | NA        | NA        | NA      | M             | NA   | NA      | NA      | NA        | NA        | NA      | NA      | NA   | M |
| Sifn4        | 10:70438 | 3.13067       | 5.0562        | 0.69158       | 1.56649       | 0.0064    | 0.26167   | U       |             | NA         | NA      | NA       | NA        | NA        | NA      | M             | NA   | NA      | NA      | NA        | NA        | NA      | NA      | NA   | M |
| Znrd1as1     | 20:20822 | 4.99894       | 8.02813       | 0.68344       | 1.70456       | 0.004     | 0.20311   | U       |             | NA         | NA      | NA       | NA        | NA        | NA      | M             | NA   | NA      | NA      | NA        | NA        | NA      | NA      | NA   | M |
| Spon1        | 1:178636 | 11.0168       | 17.675        | 0.68201       | 3.32449       | 0.00005   | 0.00828   | U       |             | NA         | NA      | NA       | NA        | NA        | NA      | M             | NA   | NA      | NA      | NA        | NA        | NA      | NA      | NA   | M |
| Bst2         | 16:19938 | 6.3283        | 10.0632       | 0.6692        | 1.67606       | 0.0045    | 0.21629   | U       |             | NA         | NA      | NA       | NA        | NA        | NA      | M             | NA   | NA      | NA      | NA        | NA        | NA      | NA      | NA   | M |
| Ube2ql1      | 1:361859 | 1.7312        | 2.75262       | 0.66904       | 1.75657       | 0.00335   | 0.18263   | U       |             | NA         | NA      | NA       | NA        | NA        | NA      | M             | NA   | NA      | NA      | NA        | NA        | NA      | NA      | NA   | M |
| Tmem241      | 18:34449 | 2.12163       | 3.3303        | 0.65048       | 1.60801       | 0.0071    | 0.27876   | U       |             | NA         | NA      | NA       | NA        | NA        | NA      | M             | NA   | NA      | NA      | NA        | NA        | NA      | NA      | NA   | M |
| Apcc1        | 18:58270 | 1.40021       | 2.19291       | 0.64721       | 1.6602        | 0.00495   | 0.22917   | U       |             | NA         | NA      | NA       | NA        | NA        | NA      | M             | NA   | NA      | NA      | NA        | NA        | NA      | NA      | NA   | M |
| Asmtl1       | 12:18532 | 8.88547       | 13.8934       | 0.64488       | 1.93442       | 0.00065   | 0.06248   | U       |             | NA         | NA      | NA       | NA        | NA        | NA      | M             | NA   | NA      | NA      | NA        | NA        | NA      | NA      | NA   | M |
| Tmcc2        | 13:49132 | 17.1055       | 26.6077       | 0.63739       | 3.02322       | 0.00005   | 0.00828   | U       |             | NA         | NA      | NA       | NA        | NA        | NA      | M             | NA   | NA      | NA      | NA        | NA        | NA      | NA      | NA   | M |
| Tlr4         | 5:825874 | 1.34375       | 2.09013       | 0.63733       | 1.66574       | 0.0049    | 0.2277    | U       |             | NA         | NA      | NA       | NA        | NA        | NA      | M             | NA   | NA      | NA      | NA        | NA        | NA      | NA      | NA   | M |
| Col4a4       | 9:883147 | 10.8815       |               |               |               |           |           |         |             |            |         |          |           |           |         |               |      |         |         |           |           |         |         |      |   |



|              |           |         |         |         |         |         |         |   |         |         |         |         |         |         |   |         |        |          |          |        |         |   |
|--------------|-----------|---------|---------|---------|---------|---------|---------|---|---------|---------|---------|---------|---------|---------|---|---------|--------|----------|----------|--------|---------|---|
| Art3         | 14:171430 | 34.521  | 47.1035 | 0.44836 | 2.27877 | 0.00005 | 0.00828 | U | NA      | NA      | NA      | NA      | NA      | NA      | M | NA      | NA     | NA       | NA       | NA     | NA      | M |
| Col4a3       | 9:883575  | 4.11487 | 5.60759 | 0.44653 | 1.53733 | 0.0073  | 0.28199 | U | NA      | NA      | NA      | NA      | NA      | NA      | M | NA      | NA     | NA       | NA       | NA     | NA      | M |
| Bambi        | 17:56905  | 20.074  | 27.2607 | 0.44149 | 1.66211 | 0.00475 | 0.22488 | U | NA      | NA      | NA      | NA      | NA      | NA      | M | NA      | NA     | NA       | NA       | NA     | NA      | M |
| Tgfb1        | 17:84001  | 5.06634 | 6.87618 | 0.44067 | 1.63895 | 0.00535 | 0.23807 | U | NA      | NA      | NA      | NA      | NA      | NA      | M | NA      | NA     | NA       | NA       | NA     | NA      | M |
| Asb4         | 4:304616  | 17.13   | 23.2365 | 0.43987 | 1.77884 | 0.00145 | 0.10934 | U | NA      | NA      | NA      | NA      | NA      | NA      | M | NA      | NA     | NA       | NA       | NA     | NA      | M |
| Hsph1        | 12:63226  | 12.7143 | 17.2378 | 0.43912 | 2.18485 | 0.0001  | 0.01415 | U | NA      | NA      | NA      | NA      | NA      | NA      | M | NA      | NA     | NA       | NA       | NA     | NA      | M |
| Rnf128       | X:110789  | 7.76088 | 10.4878 | 0.43441 | 1.62392 | 0.0047  | 0.22335 | U | NA      | NA      | NA      | NA      | NA      | NA      | M | NA      | NA     | NA       | NA       | NA     | NA      | M |
| Ppp2r5b      | 1:221558  | 6.62235 | 8.94196 | 0.43325 | 1.642   | 0.00525 | 0.23668 | U | NA      | NA      | NA      | NA      | NA      | NA      | M | NA      | NA     | NA       | NA       | NA     | NA      | M |
| Phka2        | X:359706  | 5.65087 | 7.62261 | 0.43181 | 1.89651 | 0.00085 | 0.07538 | U | NA      | NA      | NA      | NA      | NA      | NA      | M | NA      | NA     | NA       | NA       | NA     | NA      | M |
| Lpin1        | 6:417962  | 5.67432 | 7.64333 | 0.42975 | 1.82707 | 0.0016  | 0.11852 | U | NA      | NA      | NA      | NA      | NA      | NA      | M | NA      | NA     | NA       | NA       | NA     | NA      | M |
| Cxcl12       | 4:149261  | 17.7056 | 23.7696 | 0.42491 | 1.79504 | 0.0021  | 0.13992 | U | NA      | NA      | NA      | NA      | NA      | NA      | M | NA      | NA     | NA       | NA       | NA     | NA      | M |
| Pkhd11       | 7:833730  | 2.16224 | 2.90043 | 0.42374 | 1.93363 | 0.0009  | 0.07871 | U | NA      | NA      | NA      | NA      | NA      | NA      | M | NA      | NA     | NA       | NA       | NA     | NA      | M |
| Nod1         | 4:851239  | 10.1886 | 13.6658 | 0.42361 | 2.0503  | 0.00045 | 0.04802 | U | NA      | NA      | NA      | NA      | NA      | NA      | M | NA      | NA     | NA       | NA       | NA     | NA      | M |
| LOC103691908 | 3:136396  | 21.899  | 29.3585 | 0.42291 | 2.26091 | 0.0001  | 0.01415 | U | NA      | NA      | NA      | NA      | NA      | NA      | M | 31.1008 | 20.416 | -0.60725 | -1.48755 | 0.0005 | 0.11271 | D |
| Hspa12a      | 1:279946  | 2.84681 | 3.80402 | 0.41818 | 1.70811 | 0.0031  | 0.17664 | U | NA      | NA      | NA      | NA      | NA      | NA      | M | NA      | NA     | NA       | NA       | NA     | NA      | M |
| RGD1566029   | 7:125339  | 2.96196 | 3.95315 | 0.41645 | 1.51302 | 0.00635 | 0.26047 | U | NA      | NA      | NA      | NA      | NA      | NA      | M | NA      | NA     | NA       | NA       | NA     | NA      | M |
| Slco3a1      | 1:135790  | 11.2486 | 15.0091 | 0.41609 | 1.84076 | 0.0014  | 0.1075  | U | NA      | NA      | NA      | NA      | NA      | NA      | M | NA      | NA     | NA       | NA       | NA     | NA      | M |
| Robo1        | 11:92095  | 3.37668 | 4.50507 | 0.41594 | 1.61676 | 0.0051  | 0.2327  | U | NA      | NA      | NA      | NA      | NA      | NA      | M | NA      | NA     | NA       | NA       | NA     | NA      | M |
| Ptgr         | 2:257005  | 22.0807 | 29.3762 | 0.41186 | 2.17511 | 0.00015 | 0.01889 | U | 32.8303 | 87.4169 | 1.41289 | 3.82377 | 0.00005 | 0.01217 | U | NA      | NA     | NA       | NA       | NA     | NA      | M |
| Antxr2       | 14:13191  | 31.3428 | 41.6606 | 0.41055 | 2.24352 | 0.00005 | 0.00828 | U | NA      | NA      | NA      | NA      | NA      | NA      | M | NA      | NA     | NA       | NA       | NA     | NA      | M |
| Lrrc7        | 2:264910  | 2.74403 | 3.64021 | 0.40773 | 1.54457 | 0.00715 | 0.27876 | U | NA      | NA      | NA      | NA      | NA      | NA      | M | NA      | NA     | NA       | NA       | NA     | NA      | M |
| LOC100910821 | 6:263872  | 9.24334 | 12.242  | 0.40536 | 1.56216 | 0.0071  | 0.27876 | U | NA      | NA      | NA      | NA      | NA      | NA      | M | NA      | NA     | NA       | NA       | NA     | NA      | M |
| Cep57l1      | 20:46610  | 7.61603 | 10.0569 | 0.40108 | 1.56576 | 0.00485 | 0.22621 | U | NA      | NA      | NA      | NA      | NA      | NA      | M | NA      | NA     | NA       | NA       | NA     | NA      | M |
| Paqr6        | 2:187736  | 16.0262 | 21.1498 | 0.40022 | 1.62293 | 0.00385 | 0.19789 | U | NA      | NA      | NA      | NA      | NA      | NA      | M | NA      | NA     | NA       | NA       | NA     | NA      | M |
| Tsc22d3      | X:111884  | 26.1879 | 34.4518 | 0.39568 | 1.99549 | 0.00065 | 0.06248 | U | NA      | NA      | NA      | NA      | NA      | NA      | M | NA      | NA     | NA       | NA       | NA     | NA      | M |
| Myoz2        | 2:227180  | 155.41  | 204.109 | 0.39325 | 2.16247 | 0.0001  | 0.01415 | U | NA      | NA      | NA      | NA      | NA      | NA      | M | NA      | NA     | NA       | NA       | NA     | NA      | M |
| LOC103692093 | 4:597865  | 4.04723 | 5.29387 | 0.38739 | 1.79183 | 0.0017  | 0.12164 | U | NA      | NA      | NA      | NA      | NA      | NA      | M | NA      | NA     | NA       | NA       | NA     | NA      | M |
| Gpx3         | 10:40247  | 40.7148 | 53.2525 | 0.3873  | 1.99716 | 0.00075 | 0.06795 | U | NA      | NA      | NA      | NA      | NA      | NA      | M | NA      | NA     | NA       | NA       | NA     | NA      | M |
| Ptgr2        | 6:107999  | 27.331  | 35.7468 | 0.38728 | 2.0722  | 0.0003  | 0.03466 | U | NA      | NA      | NA      | NA      | NA      | NA      | M | NA      | NA     | NA       | NA       | NA     | NA      | M |
| Myo16        | 16:84575  | 6.9885  | 9.13896 | 0.38705 | 1.94009 | 0.0007  | 0.06434 | U | NA      | NA      | NA      | NA      | NA      | NA      | M | NA      | NA     | NA       | NA       | NA     | NA      | M |
| Ostc         | 2:235816  | 26.156  | 34.12   | 0.38347 | 1.68595 | 0.00335 | 0.18263 | U | NA      | NA      | NA      | NA      | NA      | NA      | M | NA      | NA     | NA       | NA       | NA     | NA      | M |
| Tnc          | 5:797896  | 6.73754 | 8.77595 | 0.38133 | 1.83916 | 0.00125 | 0.09963 | U | NA      | NA      | NA      | NA      | NA      | NA      | M | NA      | NA     | NA       | NA       | NA     | NA      | M |
| Ptxna4a      | 4:594450  | 5.17641 | 6.73927 | 0.38064 | 1.72706 | 0.00335 | 0.18263 | U | NA      | NA      | NA      | NA      | NA      | NA      | M | NA      | NA     | NA       | NA       | NA     | NA      | M |
| Abca3        | 10:13723  | 4.86513 | 6.33192 | 0.38017 | 1.7872  | 0.00165 | 0.11873 | U | NA      | NA      | NA      | NA      | NA      | NA      | M | NA      | NA     | NA       | NA       | NA     | NA      | M |
| Decr1        | 5:295738  | 29.3456 | 38.1663 | 0.37916 | 1.75401 | 0.00235 | 0.15022 | U | NA      | NA      | NA      | NA      | NA      | NA      | M | NA      | NA     | NA       | NA       | NA     | NA      | M |
| Calr         | 19:25956  | 144.219 | 187.418 | 0.378   | 2.05159 | 0.0005  | 0.05119 | U | NA      | NA      | NA      | NA      | NA      | NA      | M | NA      | NA     | NA       | NA       | NA     | NA      | M |
| Hipk2        | 4:664383  | 25.933  | 33.681  | 0.37715 | 1.83793 | 0.0014  | 0.1075  | U | NA      | NA      | NA      | NA      | NA      | NA      | M | NA      | NA     | NA       | NA       | NA     | NA      | M |
| Ltgl2        | 10:10436  | 4.96913 | 6.4434  | 0.37483 | 1.5     | 0.0079  | 0.29089 | U | NA      | NA      | NA      | NA      | NA      | NA      | M | NA      | NA     | NA       | NA       | NA     | NA      | M |
| Dock4        | 6:605661  | 3.47007 | 4.49928 | 0.37473 | 1.59502 | 0.0059  | 0.24933 | U | NA      | NA      | NA      | NA      | NA      | NA      | M | NA      | NA     | NA       | NA       | NA     | NA      | M |
| Slc25a26     | 4:126522  | 9.54763 | 12.373  | 0.37398 | 1.57741 | 0.0065  | 0.26405 | U | NA      | NA      | NA      | NA      | NA      | NA      | M | NA      | NA     | NA       | NA       | NA     | NA      | M |
| Eln          | 12:24973  | 29.4515 | 38.1566 | 0.37359 | 2.04252 | 0.00015 | 0.01889 | U | NA      | NA      | NA      | NA      | NA      | NA      | M | NA      | NA     | NA       | NA       | NA     | NA      | M |
| Cbfa2t3      | 19:55438  | 4.72574 | 6.1055  | 0.36957 | 1.56013 | 0.0063  | 0.26012 | U | NA      | NA      | NA      | NA      | NA      | NA      | M | NA      | NA     | NA       | NA       | NA     | NA      | M |
| Dab2         | 2:557473  | 11.6031 | 14.9748 | 0.36803 | 1.77906 | 0.0023  | 0.14853 | U | NA      | NA      | NA      | NA      | NA      | NA      | M | NA      | NA     | NA       | NA       | NA     | NA      | M |
| Mmd          | 10:77755  | 31.6541 | 40.8117 | 0.36659 | 1.94706 | 0.0007  | 0.06434 | U | NA      | NA      | NA      | NA      | NA      | NA      | M | NA      | NA     | NA       | NA       | NA     | NA      | M |
| Usp54        | 15:40918  | 6.58049 | 8.4827  | 0.36633 | 1.7232  | 0.0023  | 0.14853 | U | NA      | NA      | NA      | NA      | NA      | NA      | M | NA      | NA     | NA       | NA       | NA     | NA      | M |
| Igfbp1       | 2:149535  | 4.22321 | 5.43979 | 0.36521 | 1.78558 | 0.00165 | 0.11873 | U | NA      | NA      | NA      | NA      | NA      | NA      | M | NA      | NA     | NA       | NA       | NA     | NA      | M |
| Cox6a2       | 1:199624  | 213.848 | 275.347 | 0.36466 | 1.91369 | 0.00075 | 0.06795 | U | NA      | NA      | NA      | NA      | NA      | NA      | M | NA      | NA     | NA       | NA       | NA     | NA      | M |
| Sec24d       | 2:227455  | 21.2751 | 27.3037 | 0.35993 | 1.94495 | 0.00065 | 0.06248 | U | NA      | NA      | NA      | NA      | NA      | NA      | M | NA      | NA     | NA       | NA       | NA     | NA      | M |
| Hspb3        | 2:455177  | 45.6136 | 58.4211 | 0.35702 | 1.59213 | 0.0053  | 0.23668 | U | NA      | NA      | NA      | NA      | NA      | NA      | M | NA      | NA     | NA       | NA       | NA     | NA      | M |
| Mlh3         | 6:109059  | 4.75713 | 6.06499 | 0.35042 | 1.53244 | 0.00715 | 0.27876 | U | NA      | NA      | NA      | NA      | NA      | NA      | M | NA      | NA     | NA       | NA       | NA     | NA      | M |
| Csrp3        | 1:104147  | 390.997 | 497.973 | 0.34891 | 1.89696 | 0.0006  | 0.06045 | U | NA      | NA      | NA      | NA      | NA      | NA      | M | NA      | NA     | NA       | NA       | NA     | NA      | M |
| Plekhg1      | 1:403205  | 6.36268 | 8.10018 | 0.34832 | 1.54084 | 0.0081  | 0.29652 | U | NA      | NA      | NA      | NA      | NA      | NA      | M | NA      | NA     | NA       | NA       | NA     | NA      | M |
| Iitga5       | 7:144970  | 54.1114 | 68.857  | 0.34767 | 1.89129 | 0.00105 | 0.08757 | U | NA      | NA      | NA      | NA      | NA      | NA      | M | NA      | NA     | NA       | NA       | NA     | NA      | M |
| Ckb          | 6:136142  | 120.952 | 153.579 | 0.34455 | 1.80236 | 0.00145 | 0.10934 | U | NA      | NA      | NA      | NA      | NA      | NA      | M | NA      | NA     | NA       | NA       | NA     | NA      | M |
| Rasl11b      | 14:36550  | 20.4927 | 26.0161 | 0.34429 | 1.6523  | 0.00425 | 0.20906 | U | NA      | NA      | NA      | NA      | NA      | NA      | M | NA      | NA     | NA       | NA       | NA     | NA      | M |
| Hspa5        | 3:138383  | 132.123 | 167.656 | 0.34362 | 1.83766 | 0.0014  | 0.1075  | U | NA      | NA      | NA      | NA      | NA      | NA      | M | NA      | NA     | NA       | NA       | NA     | NA      | M |
| Casq1        | 13:90589  | 27.0582 | 34.2291 | 0.33916 | 1.57584 | 0.0062  | 0.25939 | U | NA      | NA      | NA      | NA      | NA      | NA      | M | NA      | NA     | NA       | NA       | NA     | NA      | M |
| Eef1a2       | 3:176657  | 163.293 | 206.006 | 0.33522 | 1.79443 | 0.00215 | 0.1425  | U | NA      | NA      | NA      | NA      | NA      | NA      | M | NA      | NA     | NA       | NA       | NA     | NA      | M |
| Vash1        | 6:110624  | 12.8737 | 16.2238 | 0.33368 | 1.57862 | 0.0066  | 0.26554 | U | NA      | NA      | NA      | NA      | NA      | NA      | M | NA      | NA     | NA       | NA       | NA     | NA      | M |
| Sema5a       | 2:853773  | 7.71805 | 9.72341 | 0.33323 | 1.79431 | 0.00175 | 0.12451 | U | NA      | NA      | NA      | NA      | NA      | NA      | M | NA      | NA     | NA       | NA       | NA     | NA      | M |
| Lamc2        | 13:70566  | 11.6045 | 14.5893 | 0.33023 | 1.72955 | 0.0026  | 0.1605  | U | NA      | NA      | NA      | NA      | NA      | NA      | M | NA      | NA     | NA       | NA       | NA     | NA      | M |
| Fam20c       | 12:17913  | 16.6309 | 20.8221 | 0.32425 | 1.64173 | 0.0045  | 0.21629 | U | NA      | NA      | NA      | NA      | NA      | NA      | M | NA      | NA     | NA       | NA       | NA     | NA      | M |
| Slc25a23     | 9:998805  | 26.4577 | 33.0356 | 0.32033 | 1.5256  | 0.00715 | 0.27876 | U | NA      | NA      | NA      | NA      | NA      | NA      | M | NA      | NA     | NA       | NA       | NA     | NA      | M |

|              |           |         |         |          |          |         |         |   |         |         |          |          |         |         |   |         |         |          |          |         |         |   |
|--------------|-----------|---------|---------|----------|----------|---------|---------|---|---------|---------|----------|----------|---------|---------|---|---------|---------|----------|----------|---------|---------|---|
| LOC103693936 | 16:31685  | 21.5511 | 26.8706 | 0.31827  | 1.73049  | 0.0028  | 0.16632 | U | NA      | NA      | NA       | NA       | NA      | NA      | M | NA      | NA      | NA       | NA       | NA      | NA      | M |
| Atp1a3       | 1:818524  | 30.7527 | 38.1546 | 0.31114  | 1.69098  | 0.00345 | 0.18646 | U | 3.20862 | 5.72663 | 0.83574  | 1.69074  | 0.00015 | 0.03072 | U | NA      | NA      | NA       | NA       | NA      | NA      | M |
| Fam126a      | 4:766171f | 27.4541 | 34.0583 | 0.31098  | 1.57475  | 0.0078  | 0.29089 | U | NA      | NA      | NA       | NA       | NA      | NA      | M | NA      | NA      | NA       | NA       | NA      | NA      | M |
| Hsp90b1      | 7:272265f | 135.308 | 167.835 | 0.3108   | 1.6422   | 0.0036  | 0.19129 | U | NA      | NA      | NA       | NA       | NA      | NA      | M | NA      | NA      | NA       | NA       | NA      | NA      | M |
| Klhl41       | 3:559101i | 22.724  | 28.1678 | 0.30983  | 1.58209  | 0.00635 | 0.26047 | U | NA      | NA      | NA       | NA       | NA      | NA      | M | NA      | NA      | NA       | NA       | NA      | NA      | M |
| Hsd12        | 5:768128f | 33.3815 | 41.2976 | 0.30701  | 1.59544  | 0.0053  | 0.23668 | U | NA      | NA      | NA       | NA       | NA      | NA      | M | NA      | NA      | NA       | NA       | NA      | NA      | M |
| RGD1305422   | 11:71150f | 21.8714 | 27.0341 | 0.30573  | 1.68256  | 0.0038  | 0.19774 | U | NA      | NA      | NA       | NA       | NA      | NA      | M | NA      | NA      | NA       | NA       | NA      | NA      | M |
| Wipf3        | 4:845968f | 30.2578 | 37.3451 | 0.30361  | 1.65487  | 0.00365 | 0.19152 | U | NA      | NA      | NA       | NA       | NA      | NA      | M | NA      | NA      | NA       | NA       | NA      | NA      | M |
| Smpd1        | 1:170383f | 23.4224 | 28.8549 | 0.30092  | 1.54638  | 0.00695 | 0.27609 | U | NA      | NA      | NA       | NA       | NA      | NA      | M | NA      | NA      | NA       | NA       | NA      | NA      | M |
| Vwf          | 4:158085f | 8.88935 | 10.9323 | 0.29845  | 1.60772  | 0.0055  | 0.24217 | U | NA      | NA      | NA       | NA       | NA      | NA      | M | NA      | NA      | NA       | NA       | NA      | NA      | M |
| Zfp462       | 5:716839f | 5.9692  | 7.32797 | 0.29588  | 1.53677  | 0.0066  | 0.26554 | U | NA      | NA      | NA       | NA       | NA      | NA      | M | NA      | NA      | NA       | NA       | NA      | NA      | M |
| Ddah1        | 2:251634f | 58.5728 | 71.8034 | 0.29382  | 1.59158  | 0.0054  | 0.23944 | U | NA      | NA      | NA       | NA       | NA      | NA      | M | NA      | NA      | NA       | NA       | NA      | NA      | M |
| Ptpn13       | 14:76885f | 9.99573 | 12.2511 | 0.29352  | 1.5535   | 0.0066  | 0.26554 | U | NA      | NA      | NA       | NA       | NA      | NA      | M | NA      | NA      | NA       | NA       | NA      | NA      | M |
| Parvb        | 7:125189f | 49.8899 | 61.1094 | 0.29265  | 1.52662  | 0.00755 | 0.28724 | U | NA      | NA      | NA       | NA       | NA      | NA      | M | NA      | NA      | NA       | NA       | NA      | NA      | M |
| Nrap         | 1:277068f | 47.119  | 57.6458 | 0.29091  | 1.5799   | 0.00605 | 0.25481 | U | NA      | NA      | NA       | NA       | NA      | NA      | M | NA      | NA      | NA       | NA       | NA      | NA      | M |
| Chchd10      | 20:13661f | 205.399 | 251.206 | 0.29044  | 1.53126  | 0.00785 | 0.29089 | U | NA      | NA      | NA       | NA       | NA      | NA      | M | NA      | NA      | NA       | NA       | NA      | NA      | M |
| Snap91       | 8:944475f | 21.5495 | 26.3402 | 0.28961  | 1.55638  | 0.0067  | 0.2687  | U | NA      | NA      | NA       | NA       | NA      | NA      | M | NA      | NA      | NA       | NA       | NA      | NA      | M |
| Ppif         | 16:19791f | 52.8147 | 64.5526 | 0.28954  | 1.53842  | 0.00775 | 0.29089 | U | 121.134 | 75.122  | -0.68929 | -2.05002 | 0.00005 | 0.01217 | D | NA      | NA      | NA       | NA       | NA      | NA      | M |
| Txlnb        | 1:129157f | 52.0063 | 63.1013 | 0.27898  | 1.53469  | 0.00735 | 0.28305 | U | NA      | NA      | NA       | NA       | NA      | NA      | M | NA      | NA      | NA       | NA       | NA      | NA      | M |
| Apobec2      | 9:145292f | 110.684 | 90.9441 | -0.2834  | -1.54165 | 0.0076  | 0.28741 | D | NA      | NA      | NA       | NA       | NA      | NA      | M | NA      | NA      | NA       | NA       | NA      | NA      | M |
| LOC103690838 | X:526149f | 34.002  | 27.6362 | -0.29906 | -1.61006 | 0.00585 | 0.24888 | D | NA      | NA      | NA       | NA       | NA      | NA      | M | NA      | NA      | NA       | NA       | NA      | NA      | M |
| LOC102553290 | 1:119052f | 370.144 | 300.605 | -0.30022 | -1.59826 | 0.0051  | 0.2327  | D | 22.6392 | 45.3959 | 1.00374  | 2.67383  | 0.00005 | 0.01217 | U | NA      | NA      | NA       | NA       | NA      | NA      | M |
| Trim35       | 15:42960f | 67.307  | 54.5305 | -0.30369 | -1.67394 | 0.00305 | 0.17459 | D | NA      | NA      | NA       | NA       | NA      | NA      | M | NA      | NA      | NA       | NA       | NA      | NA      | M |
| Myl7         | 14:86144f | 540.228 | 437.669 | -0.30373 | -1.64184 | 0.0044  | 0.21394 | D | NA      | NA      | NA       | NA       | NA      | NA      | M | 79.6046 | 148.113 | 0.89578  | 1.49871  | 0.00105 | 0.18936 | U |
| Ddx21        | 20:32213f | 14.5425 | 11.7711 | -0.30502 | -1.56449 | 0.0063  | 0.26012 | D | NA      | NA      | NA       | NA       | NA      | NA      | M | NA      | NA      | NA       | NA       | NA      | NA      | M |
| Ak1          | 3:116521f | 78.8126 | 63.771  | -0.30553 | -1.65617 | 0.0048  | 0.22555 | D | NA      | NA      | NA       | NA       | NA      | NA      | M | 79.3582 | 51.7892 | -0.61573 | -1.56356 | 0.00015 | 0.04983 | D |
| Rbm3         | X:150988f | 129.649 | 104.719 | -0.30809 | -1.62693 | 0.0061  | 0.25606 | D | NA      | NA      | NA       | NA       | NA      | NA      | M | NA      | NA      | NA       | NA       | NA      | NA      | M |
| Rcn2         | 8:607098f | 24.0997 | 19.337  | -0.31765 | -1.53723 | 0.0079  | 0.29089 | D | NA      | NA      | NA       | NA       | NA      | NA      | M | NA      | NA      | NA       | NA       | NA      | NA      | M |
| Fus          | 1:199412f | 113.03  | 90.4621 | -0.32132 | -1.76834 | 0.0022  | 0.1443  | D | NA      | NA      | NA       | NA       | NA      | NA      | M | NA      | NA      | NA       | NA       | NA      | NA      | M |
| LOC103690839 | X:530533f | 12.2169 | 9.7134  | -0.33083 | -1.6325  | 0.0044  | 0.21394 | D | NA      | NA      | NA       | NA       | NA      | NA      | M | NA      | NA      | NA       | NA       | NA      | NA      | M |
| Nrk          | X:109940f | 13.5551 | 10.7312 | -0.33704 | -1.70104 | 0.0024  | 0.15112 | D | NA      | NA      | NA       | NA       | NA      | NA      | M | NA      | NA      | NA       | NA       | NA      | NA      | M |
| Zfp395       | 15:48789f | 10.2247 | 8.08922 | -0.33798 | -1.57237 | 0.00575 | 0.24629 | D | NA      | NA      | NA       | NA       | NA      | NA      | M | NA      | NA      | NA       | NA       | NA      | NA      | M |
| 2-Mar        | 7:185592f | 33.5155 | 26.5007 | -0.3388  | -1.57588 | 0.0057  | 0.24582 | D | NA      | NA      | NA       | NA       | NA      | NA      | M | NA      | NA      | NA       | NA       | NA      | NA      | M |
| Nup210       | 4:122643f | 13.8058 | 10.9073 | -0.33997 | -1.80657 | 0.00165 | 0.11873 | D | NA      | NA      | NA       | NA       | NA      | NA      | M | NA      | NA      | NA       | NA       | NA      | NA      | M |
| Guk1         | 10:45535f | 73.3456 | 57.7192 | -0.34566 | -1.71448 | 0.00315 | 0.17868 | D | NA      | NA      | NA       | NA       | NA      | NA      | M | NA      | NA      | NA       | NA       | NA      | NA      | M |
| LOC100911253 | X:119196f | 5.56158 | 4.35579 | -0.35256 | -1.58029 | 0.0048  | 0.22555 | D | NA      | NA      | NA       | NA       | NA      | NA      | M | NA      | NA      | NA       | NA       | NA      | NA      | M |
| Rgs3         | 5:784290f | 23.2895 | 18.2372 | -0.3528  | -1.79844 | 0.00195 | 0.13274 | D | NA      | NA      | NA       | NA       | NA      | NA      | M | NA      | NA      | NA       | NA       | NA      | NA      | M |
| Depdc1       | 2:264704f | 17.856  | 13.8193 | -0.36972 | -1.76086 | 0.0019  | 0.13004 | D | NA      | NA      | NA       | NA       | NA      | NA      | M | NA      | NA      | NA       | NA       | NA      | NA      | M |
| Gpr89b       | 2:198999f | 16.9246 | 13.0281 | -0.37749 | -1.62287 | 0.00555 | 0.24268 | D | NA      | NA      | NA       | NA       | NA      | NA      | M | NA      | NA      | NA       | NA       | NA      | NA      | M |
| Ror2         | 17:11953f | 20.9654 | 16.1279 | -0.37846 | -1.97654 | 0.0007  | 0.06434 | D | NA      | NA      | NA       | NA       | NA      | NA      | M | NA      | NA      | NA       | NA       | NA      | NA      | M |
| Ppp1r3b      | 16:60415f | 43.283  | 33.2823 | -0.37905 | -2.06949 | 0.00015 | 0.01889 | D | NA      | NA      | NA       | NA       | NA      | NA      | M | NA      | NA      | NA       | NA       | NA      | NA      | M |
| Id1          | 3:148214f | 40.8234 | 31.3651 | -0.38024 | -1.65908 | 0.0041  | 0.2057  | D | NA      | NA      | NA       | NA       | NA      | NA      | M | NA      | NA      | NA       | NA       | NA      | NA      | M |
| Cirbp        | 7:124000f | 44.9244 | 34.51   | -0.38049 | -1.74548 | 0.00285 | 0.16771 | D | NA      | NA      | NA       | NA       | NA      | NA      | M | NA      | NA      | NA       | NA       | NA      | NA      | M |
| Pfkl         | 20:11393f | 66.4481 | 51.0392 | -0.38062 | -2.08938 | 0.00025 | 0.02942 | D | NA      | NA      | NA       | NA       | NA      | NA      | M | NA      | NA      | NA       | NA       | NA      | NA      | M |
| Slc2a1       | 5:138154f | 63.1389 | 48.4072 | -0.38331 | -2.10832 | 0.0005  | 0.05119 | D | NA      | NA      | NA       | NA       | NA      | NA      | M | NA      | NA      | NA       | NA       | NA      | NA      | M |
| Cntnap1      | 10:89086f | 12.7443 | 9.75881 | -0.38508 | -1.95081 | 0.0007  | 0.06434 | D | NA      | NA      | NA       | NA       | NA      | NA      | M | NA      | NA      | NA       | NA       | NA      | NA      | M |
| Gnl1         | 20:32905f | 14.03   | 10.7362 | -0.38603 | -1.64081 | 0.00385 | 0.19789 | D | NA      | NA      | NA       | NA       | NA      | NA      | M | NA      | NA      | NA       | NA       | NA      | NA      | M |
| Rufy3        | 14:21058f | 16.775  | 12.7972 | -0.39049 | -1.93023 | 0.00065 | 0.06248 | D | NA      | NA      | NA       | NA       | NA      | NA      | M | NA      | NA      | NA       | NA       | NA      | NA      | M |
| Slc2a4       | 10:56552f | 17.7747 | 13.5511 | -0.39142 | -1.86455 | 0.00115 | 0.09465 | D | NA      | NA      | NA       | NA       | NA      | NA      | M | NA      | NA      | NA       | NA       | NA      | NA      | M |
| Plagl1       | 1:721958f | 33.1528 | 25.2696 | -0.39173 | -2.14675 | 0.0001  | 0.01415 | D | NA      | NA      | NA       | NA       | NA      | NA      | M | NA      | NA      | NA       | NA       | NA      | NA      | M |
| C7           | 2:547076f | 12.1246 | 9.22784 | -0.39387 | -1.96912 | 0.00095 | 0.08083 | D | NA      | NA      | NA       | NA       | NA      | NA      | M | NA      | NA      | NA       | NA       | NA      | NA      | M |
| Capn6        | X:115049f | 10.6295 | 8.08782 | -0.39425 | -1.79694 | 0.0018  | 0.12735 | D | NA      | NA      | NA       | NA       | NA      | NA      | M | NA      | NA      | NA       | NA       | NA      | NA      | M |
| Lrp12        | 7:788597f | 7.07065 | 5.37403 | -0.39584 | -1.7013  | 0.00355 | 0.18943 | D | NA      | NA      | NA       | NA       | NA      | NA      | M | NA      | NA      | NA       | NA       | NA      | NA      | M |
| Bag2         | 9:384564f | 21.5579 | 16.3337 | -0.40037 | -1.75049 | 0.0019  | 0.13004 | D | NA      | NA      | NA       | NA       | NA      | NA      | M | NA      | NA      | NA       | NA       | NA      | NA      | M |
| LOC103692592 | 6:306297f | 669.48  | 507.194 | -0.4005  | -2.1539  | 0.00015 | 0.01889 | D | NA      | NA      | NA       | NA       | NA      | NA      | M | NA      | NA      | NA       | NA       | NA      | NA      | M |
| Acta2        | 1:252537f | 177.066 | 134.028 | -0.40175 | -2.16348 | 0.00015 | 0.01889 | D | NA      | NA      | NA       | NA       | NA      | NA      | M | NA      | NA      | NA       | NA       | NA      | NA      | M |
| Rpl30        | 7:732135f | 134.551 | 101.725 | -0.40349 | -1.83511 | 0.0015  | 0.11244 | D | NA      | NA      | NA       | NA       | NA      | NA      | M | NA      | NA      | NA       | NA       | NA      | NA      | M |
| Hbb          | 1:168971f | 1379.73 | 1042.61 | -0.40419 | -1.87344 | 0.00155 | 0.1155  | D | NA      | NA      | NA       | NA       | NA      | NA      | M | 145.267 | 262.457 | 0.85337  | 2.08464  | 0.00005 | 0.02177 | U |
| Ddc          | 14:91905f | 120.056 | 90.718  | -0.40425 | -2.03827 | 0.00055 | 0.05586 | D | NA      | NA      | NA       | NA       | NA      | NA      | M | NA      | NA      | NA       | NA       | NA      | NA      | M |
| Spard1       | 14:69942f | 43.1141 | 32.542  | -0.40586 | -2.18011 | 0.00015 | 0.01889 | D | NA      | NA      | NA       | NA       | NA      | NA      | M | NA      | NA      | NA       | NA       | NA      | NA      | M |
| Bnip3        | 1:211248f | 119.481 | 89.9462 | -0.40964 | -2.26117 | 0.0001  | 0.01415 | D | NA      | NA      | NA       | NA       | NA      | NA      | M | NA      | NA      | NA       | NA       | NA      | NA      | M |
| Csrp2bp      | 3:138508f | 6.39193 | 4.80301 | -0.41231 | -1.63364 | 0.0043  | 0.2107  | D | NA      | NA      | NA       | NA       | NA      | NA      | M | NA      | NA      | NA       | NA       | NA      | NA      | M |
| Uap111       | 3:257924f | 8.78978 | 6.59389 | -0.4147  | -1.6802  | 0.00465 | 0.22181 | D | NA      | NA      | NA       | NA       | NA      | NA      | M | NA      | NA      | NA       | NA       | NA      | NA      | M |

|              |           |         |         |          |          |         |         |   |    |    |    |    |    |    |         |         |          |          |         |         |   |
|--------------|-----------|---------|---------|----------|----------|---------|---------|---|----|----|----|----|----|----|---------|---------|----------|----------|---------|---------|---|
| Mycn         | 6:382225f | 10.7063 | 7.98738 | -0.42266 | -1.73666 | 0.00335 | 0.18263 | D | NA      | NA      | NA       | NA       | NA      | M       |   |
| Cxhc4        | 2:239414f | 18.4144 | 13.7349 | -0.42299 | -2.24857 | 0.00005 | 0.00828 | D | NA      | NA      | NA       | NA       | NA      | NA      | M |
| Abcg1        | 20:97432f | 7.79943 | 5.81522 | -0.42353 | -1.76828 | 0.0026  | 0.1605  | D | NA      | NA      | NA       | NA       | NA      | NA      | M |
| Mfsd10       | 14:81362f | 11.9467 | 8.89188 | -0.42605 | -1.60072 | 0.00575 | 0.24629 | D | NA      | NA      | NA       | NA       | NA      | NA      | M |
| Cenpa        | 6:270722f | 18.788  | 13.9507 | -0.42948 | -1.82469 | 0.00135 | 0.10625 | D | NA      | NA      | NA       | NA       | NA      | NA      | M |
| Prim1        | 7:243555f | 30.9532 | 22.9515 | -0.4315  | -2.06214 | 0.00025 | 0.02942 | D | NA      | NA      | NA       | NA       | NA      | NA      | M |
| Parp4        | 15:36809f | 16.9583 | 12.5147 | -0.43837 | -2.35389 | 0.0001  | 0.01415 | D | NA      | NA      | NA       | NA       | NA      | NA      | M |
| Elf4         | X:135185f | 8.85653 | 6.5329  | -0.43902 | -1.56255 | 0.0074  | 0.28325 | D | NA      | NA      | NA       | NA       | NA      | NA      | M |
| Cenpt        | 19:37795f | 12.9166 | 9.46174 | -0.44905 | -1.71648 | 0.00325 | 0.18109 | D | NA      | NA      | NA       | NA       | NA      | NA      | M |
| RGD1311744   | 8:433151f | 10.6832 | 7.78921 | -0.4558  | -2.1397  | 0.00035 | 0.04007 | D | NA      | NA      | NA       | NA       | NA      | NA      | M |
| LOC103690947 | 1:332775f | 6.0893  | 4.41562 | -0.46366 | -1.79106 | 0.0022  | 0.1443  | D | NA      | NA      | NA       | NA       | NA      | NA      | M |
| Fpgs         | 3:117176f | 5.73389 | 4.14121 | -0.46946 | -1.57676 | 0.00515 | 0.23329 | D | NA      | NA      | NA       | NA       | NA      | NA      | M |
| Mthfd2       | 4:115004f | 8.22463 | 5.91763 | -0.47493 | -1.70054 | 0.00385 | 0.19789 | D | NA      | NA      | NA       | NA       | NA      | NA      | M |
| Ntn1         | 10:54761f | 32.8293 | 23.4782 | -0.48366 | -2.33299 | 0.00005 | 0.00828 | D | NA      | NA      | NA       | NA       | NA      | NA      | M |
| Hey2         | 1:291911f | 31.1747 | 22.2872 | -0.48417 | -2.4935  | 0.00005 | 0.00828 | D | NA      | NA      | NA       | NA       | NA      | NA      | M |
| App2         | 7:262564f | 14.3174 | 10.184  | -0.49146 | -2.25875 | 0.00005 | 0.00828 | D | NA      | NA      | NA       | NA       | NA      | NA      | M |
| Hunk         | 11:30550f | 12.0645 | 8.55145 | -0.49653 | -2.01744 | 0.0007  | 0.06434 | D | NA      | NA      | NA       | NA       | NA      | NA      | M |
| Alas2        | X:231675f | 65.1218 | 46.1093 | -0.49808 | -2.5443  | 0.00005 | 0.00828 | D | NA      | NA      | NA       | NA       | NA      | NA      | M |
| Eff1e1       | 17:26785f | 17.6198 | 12.4742 | -0.49825 | -1.73668 | 0.00275 | 0.16491 | D | NA      | NA      | NA       | NA       | NA      | NA      | M |
| Ilvbl        | 7:140445f | 6.22496 | 4.39932 | -0.50079 | -1.68987 | 0.0039  | 0.19965 | D | NA      | NA      | NA       | NA       | NA      | NA      | M |
| LOC100134871 | 1:168957f | 2445.12 | 1698.01 | -0.52606 | -2.09806 | 0.00085 | 0.07538 | D | NA | NA | NA | NA | NA | NA | 183.212 | 300.802 | 0.7153   | 1.78061  | 0.00005 | 0.02177 | U |
| RGD1562465   | 3:3203-10 | 5.82749 | 4.04322 | -0.52737 | -1.57038 | 0.0068  | 0.27099 | D | NA      | NA      | NA       | NA       | NA      | NA      | M |
| LOC100911266 | 3:409201f | 16.0267 | 11.0088 | -0.54182 | -1.84812 | 0.0012  | 0.09687 | D | NA      | NA      | NA       | NA       | NA      | NA      | M |
| S100a4       | 2:189997f | 88.6634 | 60.4001 | -0.55379 | -2.32538 | 0.0001  | 0.01415 | D | NA      | NA      | NA       | NA       | NA      | NA      | M |
| Bmp10        | 4:119224f | 8.93947 | 6.07154 | -0.55813 | -1.67132 | 0.00515 | 0.23329 | D | NA      | NA      | NA       | NA       | NA      | NA      | M |
| Htra1        | 1:201499f | 5.00156 | 3.37913 | -0.56573 | -1.66426 | 0.0051  | 0.2327  | D | NA      | NA      | NA       | NA       | NA      | NA      | M |
| Rgs2         | 13:60846f | 14.6541 | 9.89545 | -0.56647 | -1.54435 | 0.00745 | 0.2843  | D | NA      | NA      | NA       | NA       | NA      | NA      | M |
| Myc          | 7:102586f | 11.5247 | 7.77837 | -0.56718 | -2.32994 | 0.00005 | 0.00828 | D | NA | NA | NA | NA | NA | NA | 24.7957 | 12.3916 | -1.00073 | -1.50065 | 0.00095 | 0.18739 | D |
| Cyp4f6       | 7:151989f | 5.68601 | 3.83282 | -0.56901 | -1.65552 | 0.0057  | 0.24582 | D | NA      | NA      | NA       | NA       | NA      | NA      | M |
| Pygl         | 6:925977f | 6.73137 | 4.51345 | -0.57667 | -2.09007 | 0.00045 | 0.04802 | D | NA      | NA      | NA       | NA       | NA      | NA      | M |
| Ptk2b        | 15:42827f | 2.10235 | 1.40598 | -0.58043 | -1.57092 | 0.00625 | 0.26012 | D | NA      | NA      | NA       | NA       | NA      | NA      | M |
| Vwa1         | 5:173216f | 3.72914 | 2.49361 | -0.58061 | -1.63569 | 0.00555 | 0.24268 | D | NA      | NA      | NA       | NA       | NA      | NA      | M |
| Tle6         | 7:109641f | 4.55791 | 3.04609 | -0.58141 | -1.67745 | 0.0041  | 0.2057  | D | NA      | NA      | NA       | NA       | NA      | NA      | M |
| Syt14        | 13:11163f | 2.81964 | 1.88254 | -0.58283 | -1.63197 | 0.0032  | 0.1791  | D | NA      | NA      | NA       | NA       | NA      | NA      | M |
| Txnrd2       | 11:86667f | 10.8621 | 7.20456 | -0.59232 | -1.59852 | 0.00675 | 0.26985 | D | NA      | NA      | NA       | NA       | NA      | NA      | M |
| Ssh3         | 1:219511f | 2.69961 | 1.78882 | -0.59375 | -1.56903 | 0.0076  | 0.28741 | D | NA      | NA      | NA       | NA       | NA      | NA      | M |
| Rfx2         | 9:102161f | 3.6324  | 2.39744 | -0.59943 | -1.89444 | 0.00165 | 0.11873 | D | NA      | NA      | NA       | NA       | NA      | NA      | M |
| Apold1       | 4:168752f | 11.8774 | 7.83213 | -0.60074 | -2.63628 | 0.00005 | 0.00828 | D | NA      | NA      | NA       | NA       | NA      | NA      | M |
| LOC102550100 | 1:278019f | 10.0709 | 6.60724 | -0.60807 | -2.45172 | 0.0001  | 0.01415 | D | NA      | NA      | NA       | NA       | NA      | NA      | M |
| Scd          | 1:264059f | 109.251 | 70.9415 | -0.62295 | -3.24467 | 0.00005 | 0.00828 | D | NA      | NA      | NA       | NA       | NA      | NA      | M |
| Gja5         | 2:199162f | 39.529  | 25.6211 | -0.62558 | -3.15012 | 0.00005 | 0.00828 | D | NA      | NA      | NA       | NA       | NA      | NA      | M |
| Tgm1         | 15:34378f | 5.97302 | 3.85932 | -0.63011 | -2.00958 | 0.0023  | 0.14853 | D | NA      | NA      | NA       | NA       | NA      | NA      | M |
| Sic25a30     | 15:57811f | 26.7633 | 17.1646 | -0.64082 | -2.9383  | 0.00005 | 0.00828 | D | NA      | NA      | NA       | NA       | NA      | NA      | M |
| Figl1        | 14:91895f | 32.2614 | 20.3957 | -0.66154 | -3.43494 | 0.00005 | 0.00828 | D | NA      | NA      | NA       | NA       | NA      | NA      | M |
| Penk         | 5:170564f | 14.1664 | 8.95453 | -0.66178 | -2.30271 | 0.00005 | 0.00828 | D | NA      | NA      | NA       | NA       | NA      | NA      | M |
| Map4k1       | 1:879371f | 10.7298 | 6.67382 | -0.68504 | -2.8259  | 0.00005 | 0.00828 | D | NA      | NA      | NA       | NA       | NA      | NA      | M |
| LOC680627    | 16:51381f | 2.34598 | 1.45367 | -0.69049 | -2.00047 | 0.0021  | 0.13992 | D | NA      | NA      | NA       | NA       | NA      | NA      | M |
| LOC103694350 | 19:53799f | 4.23989 | 2.62356 | -0.6925  | -2.14775 | 0.00045 | 0.04802 | D | NA      | NA      | NA       | NA       | NA      | NA      | M |
| Sgk1         | 1:241854f | 13.6225 | 8.42871 | -0.6926  | -2.94963 | 0.00005 | 0.00828 | D | NA      | NA      | NA       | NA       | NA      | NA      | M |
| S100a6       | 2:190007f | 25.8364 | 15.9586 | -0.69507 | -1.68532 | 0.00565 | 0.24535 | D | NA      | NA      | NA       | NA       | NA      | NA      | M |
| LOC691254    | 5:164031f | 3.00132 | 1.84977 | -0.69825 | -1.4842  | 0.00485 | 0.22621 | D | NA      | NA      | NA       | NA       | NA      | NA      | M |
| Myh11        | 10:11771f | 10.4608 | 6.36098 | -0.71767 | -1.83772 | 0.0021  | 0.13992 | D | NA      | NA      | NA       | NA       | NA      | NA      | M |
| Adora2b      | 10:48569f | 2.81379 | 1.71091 | -0.71775 | -1.63081 | 0.00585 | 0.24888 | D | NA      | NA      | NA       | NA       | NA      | NA      | M |
| Col26a1      | 12:22834f | 7.64217 | 4.64032 | -0.71976 | -2.6206  | 0.00005 | 0.00828 | D | NA      | NA      | NA       | NA       | NA      | NA      | M |
| Apln         | X:134856f | 4.08783 | 2.47746 | -0.72247 | -2.27778 | 0.00025 | 0.02942 | D | NA      | NA      | NA       | NA       | NA      | NA      | M |
| Retsat       | 4:100465f | 20.2224 | 12.0183 | -0.75073 | -3.17022 | 0.00005 | 0.00828 | D | NA      | NA      | NA       | NA       | NA      | NA      | M |
| Myd88        | 8:128022f | 3.30848 | 1.96028 | -0.75511 | -1.87065 | 0.00145 | 0.10934 | D | NA      | NA      | NA       | NA       | NA      | NA      | M |
| Hoga1        | 1:261291f | 2.61738 | 1.53381 | -0.77101 | -1.72925 | 0.0034  | 0.18455 | D | NA      | NA      | NA       | NA       | NA      | NA      | M |
| Hk2          | 4:113559f | 32.6351 | 19.0199 | -0.77891 | -4.04669 | 0.00005 | 0.00828 | D | NA      | NA      | NA       | NA       | NA      | NA      | M |
| Kcnj14       | 1:101805f | 1.90531 | 1.0981  | -0.79502 | -1.76518 | 0.0032  | 0.1791  | D | NA      | NA      | NA       | NA       | NA      | NA      | M |
| Acss1        | 3:146420f | 2.15562 | 1.24084 | -0.79679 | -2.07148 | 0.00065 | 0.06248 | D | NA      | NA      | NA       | NA       | NA      | NA      | M |
| Elp6         | 8:118525f | 4.40815 | 2.50915 | -0.81298 | -1.79174 | 0.00295 | 0.1712  | D | NA      | NA      | NA       | NA       | NA      | NA      | M |
| LOC103693625 | 12:32531f | 4.594   | 2.55752 | -0.84501 | -2.17118 | 0.0004  | 0.04458 | D | NA      | NA      | NA       | NA       | NA      | NA      | M |









**Supplementary Table 7****Summary of DMRs on start region of Chromosome 13 that only hypomethylated in Fetal Rats**

| <b>Chromosome</b> | <b>Start</b> | <b>End</b> | <b>Feature.name</b> | <b>External_gene_name</b> | <b>Genename</b>                                           |
|-------------------|--------------|------------|---------------------|---------------------------|-----------------------------------------------------------|
| "chr13"           | 5172048      | 5172146    | "NM_001047866"      | "Cntnap5c"                | "contactin associated protein-like 5C"                    |
| "chr13"           | 5543688      | 5543743    | "NM_001047866"      | "Cntnap5c"                | "contactin associated protein-like 5C"                    |
| "chr13"           | 9074437      | 9074650    | "NM_001001076"      | "Olr1064"                 | "olfactory receptor 1064"                                 |
| "chr13"           | 13572703     | 13572840   | "NM_001329899"      | "LOC304725"               | NA                                                        |
| "chr13"           | 16422440     | 16422635   | "NM_001329899"      | "LOC304725"               | NA                                                        |
| "chr13"           | 18820387     | 18820444   | "NM_001047873"      | "Cntnap5b"                | "contactin associated protein-like 5B"                    |
| "chr13"           | 21242477     | 21242586   | "NM_001047873"      | "Cntnap5b"                | "contactin associated protein-like 5B"                    |
| "chr13"           | 23852753     | 23852801   | "NM_001012748"      | "Cdh20"                   | "cadherin 20"                                             |
| "chr13"           | 26392726     | 26392767   | "NM_021657"         | "Phlpp1"                  | "PH domain and leucine rich repeat protein phosphatase 1" |

## Supplementary Data 1

## Summary of enriched pathways after antenatal hypoxia exposure

| Ingenuity Canonical Pathways                             | Group      | -log(p-val Ratio) | Molecules                                                                    |
|----------------------------------------------------------|------------|-------------------|------------------------------------------------------------------------------|
| Unfolded protein response                                | Fetal      | 2.84              | 0.122 HSPA8,CALR,HSP90B1,HSPH1,HSPA5                                         |
| Agranulocyte Adhesion and Diapedesis                     | Fetal      | 2.83              | 0.0854 ACTA2,CXCR4,CXCL12,ITGA5,MYL4,MYH11,MYL7                              |
| Calcium Signaling                                        | Fetal      | 2.59              | 0.0696 CALR,ACTA2,CASQ1,TRDN,MYL4,MYH11,MYL7,ATP2B2                          |
| Aldosterone Signaling in Epithelial Cells                | Fetal      | 2.32              | 0.0693 HSPB3,HSPA8,HSP90B1,SGK1,HSPH1,HSPA5,HSPB6                            |
| Endoplasmic Reticulum Stress Pathway                     | Fetal      | 2.32              | 0.176 CALR,HSP90B1,HSPA5                                                     |
| Regulation of Actin-based Motility by Rho                | Fetal      | 2.24              | 0.0893 ACTA2,PAK6,ITGA5,MYL4,MYL7                                            |
| ERK/MAPK Signaling                                       | Fetal      | 2.13              | 0.0584 HSPB3,MYC,ELF4,MYCN,PAK6,PPP2R5B,ITGA5,RAPGEF4                        |
| TREM1 Signaling                                          | Fetal      | 2.08              | 0.103 TLR4,MYD88,ITGA5,NOD1                                                  |
| Axonal Guidance Signaling                                | Fetal      | 2.05              | 0.0451 RGS3,PAK6,CXCR4,SEMA5A,CXCL12,ITGA5,EPHB3,MYL4,SEMA3C,NTN1,BMP10,MYL7 |
| Ephrin Receptor Signaling                                | Fetal      | 1.9               | 0.0579 RGS3,PAK6,PTPN13,CXCR4,CXCL12,ITGA5,EPHB3                             |
| Vitamin-C Transport                                      | Fetal      | 1.86              | 0.222 SLC2A1,SLC2A4                                                          |
| Cellular Effects of Sildenafil (Viagra)                  | Fetal      | 1.81              | 0.0704 PDE2A,ACTA2,MYL4,MYH11,MYL7                                           |
| PAK Signaling                                            | Fetal      | 1.79              | 0.0694 PAK6,ITGA5,EPHB3,MYL4,MYL7                                            |
| Ephrin B Signaling                                       | Fetal      | 1.68              | 0.0784 RGS3,CXCR4,CXCL12,EPHB3                                               |
| Antioxidant Action of Vitamin C                          | Fetal      | 1.58              | 0.0727 PLBD1,PLA2G16,SLC2A1,SLC2A4                                           |
| D-myo-inositol (1,4,5,6)-Tetrakisphosphate Biosynthesis  | Fetal      | 1.55              | 0.0602 PTPN13,EPHX2,PPP2R5B,SSH3,NUDT14                                      |
| D-myo-inositol (3,4,5,6)-tetrakisphosphate Biosynthesis  | Fetal      | 1.55              | 0.0602 PTPN13,EPHX2,PPP2R5B,SSH3,NUDT14                                      |
| Inflammasome pathway                                     | Fetal      | 1.54              | 0.154 TLR4,MYD88                                                             |
| Death Receptor Signaling                                 | Fetal      | 1.43              | 0.0656 HSPB3,ACTA2,PARP4,CYCS                                                |
| Actin Cytoskeleton Signaling                             | Fetal      | 1.42              | 0.0461 ACTA2,PAK6,SSH3,ITGA5,MYL4,MYH11,MYL7                                 |
| D-myo-inositol-5-phosphate Metabolism                    | Fetal      | 1.42              | 0.0556 PTPN13,EPHX2,PPP2R5B,SSH3,NUDT14                                      |
| 3-phosphoinositide Biosynthesis                          | Fetal      | 1.41              | 0.0496 PTPN13,EPHX2,PPP2R5B,SSH3,KIT,NUDT14                                  |
| Hepatic Fibrosis / Hepatic Stellate Cell Activation      | Fetal      | 1.39              | 0.0492 TLR4,ACTA2,MYL4,BAMBI,MYH11,MYL7                                      |
| Neuregulin Signaling                                     | Fetal      | 1.39              | 0.0635 MYC,HSP90B1,ITGA5,HBEGF                                               |
| Serotonin and Melatonin Biosynthesis                     | Fetal      | 1.39              | 0.5 DDC                                                                      |
| GDP-L-fucose Biosynthesis II (from L-fucose)             | Fetal      | 1.39              | 0.5 FPGT                                                                     |
| 3-phosphoinositide Degradation                           | Fetal      | 1.32              | 0.0521 PTPN13,EPHX2,PPP2R5B,SSH3,NUDT14                                      |
| Type I Diabetes Mellitus Signaling                       | Adult Male | 3.74              | 0.0781 NFKBIA,HLA-A,HLA-DQB1,STAT1,IRF1                                      |
| Antigen Presentation Pathway                             | Adult Male | 3.62              | 0.2 HLA-A,HLA-DQB1,TAP1                                                      |
| Th1 Pathway                                              | Adult Male | 3.52              | 0.0704 HLA-A,CD274,HLA-DQB1,STAT1,IRF1                                       |
| Interferon Signaling                                     | Adult Male | 3.31              | 0.158 STAT1,TAP1,IRF1                                                        |
| OX40 Signaling Pathway                                   | Adult Male | 3                 | 0.125 NFKBIA,HLA-A,HLA-DQB1                                                  |
| Th1 and Th2 Activation Pathway                           | Adult Male | 2.92              | 0.0521 HLA-A,CD274,HLA-DQB1,STAT1,IRF1                                       |
| Nur77 Signaling in T Lymphocytes                         | Adult Male | 2.67              | 0.0968 HLA-A,NR4A1,HLA-DQB1                                                  |
| Autoimmune Thyroid Disease Signaling                     | Adult Male | 2.62              | 0.222 HLA-A,HLA-DQB1                                                         |
| Role of PKR in Interferon Induction and Antiviral Respon | Adult Male | 2.59              | 0.0909 NFKBIA,STAT1,IRF1                                                     |
| T Helper Cell Differentiation                            | Adult Male | 2.59              | 0.0909 HLA-A,HLA-DQB1,STAT1                                                  |
| Eicosanoid Signaling                                     | Adult Male | 2.59              | 0.0909 PLBD1,PLA2G16,PTGDS                                                   |
| iNOS Signaling                                           | Adult Male | 2.55              | 0.0882 NFKBIA,STAT1,IRF1                                                     |
| Calcium-induced T Lymphocyte Apoptosis                   | Adult Male | 2.45              | 0.0811 HLA-A,NR4A1,HLA-DQB1                                                  |
| IL-15 Production                                         | Adult Male | 2.44              | 0.182 STAT1,IRF1                                                             |
| Allograft Rejection Signaling                            | Adult Male | 2.44              | 0.182 HLA-A,HLA-DQB1                                                         |

|                                                             |              |      |        |                             |
|-------------------------------------------------------------|--------------|------|--------|-----------------------------|
| B Cell Development                                          | Adult Male   | 2.36 | 0.167  | HLA-A,HLA-DQB1              |
| Graft-versus-Host Disease Signaling                         | Adult Male   | 2.23 | 0.143  | HLA-A,HLA-DQB1              |
| Dendritic Cell Maturation                                   | Adult Male   | 2.09 | 0.0421 | NFKBIA,HLA-A,HLA-DQB1,STAT1 |
| Complement System                                           | Adult Male   | 2.01 | 0.111  | C3,CFB                      |
| Glycolysis I                                                | Adult Male   | 1.97 | 0.105  | ENO3,PFKP                   |
| Nicotine Degradation II                                     | Adult Male   | 1.92 | 0.1    | FMO2,FMO1                   |
| Antioxidant Action of Vitamin C                             | Adult Male   | 1.9  | 0.0517 | PLBD1,PLA2G16,NFKBIA        |
| Retinoic acid Mediated Apoptosis Signaling                  | Adult Male   | 1.74 | 0.08   | PARP9,IRF1                  |
| Cdc42 Signaling                                             | Adult Male   | 1.7  | 0.0435 | HLA-A,MYL4,HLA-DQB1         |
| Phospholipases                                              | Adult Male   | 1.67 | 0.0741 | PLBD1,PLA2G16               |
| IL-17A Signaling in Fibroblasts                             | Adult Male   | 1.64 | 0.0714 | NFKBIA,LCN2                 |
| Role of Lipids/Lipid Rafts in the Pathogenesis of Influenza | Adult Male   | 1.6  | 0.333  | RSAD2                       |
| iCOS-iCOSL Signaling in T Helper Cells                      | Adult Male   | 1.58 | 0.039  | NFKBIA,HLA-A,HLA-DQB1       |
| PKCθ Signaling in T Lymphocytes                             | Adult Male   | 1.48 | 0.0357 | NFKBIA,HLA-A,HLA-DQB1       |
| CD28 Signaling in T Helper Cells                            | Adult Male   | 1.47 | 0.0353 | NFKBIA,HLA-A,HLA-DQB1       |
| AMPK Signaling                                              | Adult Male   | 1.46 | 0.0272 | PFKFB3,PFKP,PFKFB2,EIF4EBP1 |
| Activation of IRF by Cytosolic Pattern Recognition Receptor | Adult Male   | 1.46 | 0.0571 | NFKBIA,STAT1                |
| Role of IL-17A in Psoriasis                                 | Adult Male   | 1.39 | 0.2    | S100A9                      |
| Altered T Cell and B Cell Signaling in Rheumatoid Arthritis | Adult Male   | 1.38 | 0.0513 | HLA-A,HLA-DQB1              |
| NAD Salvage Pathway III                                     | Adult Female | 1.9  | 0.5    | NMRK2                       |
| Agranulocyte Adhesion and Diapedesis                        | Adult Female | 1.83 | 0.0366 | CXCL2,MYL7,SELPLG           |
| Role of Lipids/Lipid Rafts in the Pathogenesis of Influenza | Adult Female | 1.73 | 0.333  | RSAD2                       |
| Role of IL-17A in Psoriasis                                 | Adult Female | 1.51 | 0.2    | S100A9                      |
| Mevalonate Pathway I                                        | Adult Female | 1.51 | 0.2    | HMGCS2                      |
| Ceramide Degradation                                        | Adult Female | 1.51 | 0.2    | ACER2                       |
| Sphingosine and Sphingosine-1-phosphate Metabolism          | Adult Female | 1.36 | 0.143  | ACER2                       |
| Ketogenesis                                                 | Adult Female | 1.36 | 0.143  | HMGCS2                      |
| Superpathway of Geranylgeranyldiphosphate Biosynthesis      | Adult Female | 1.36 | 0.143  | HMGCS2                      |
| STAT3 Pathway                                               | Adult Female | 1.33 | 0.0364 | MYC,SOCS3                   |
| Differential Regulation of Cytokine Production in Intestine | Adult Female | 1.31 | 0.125  | LCN2                        |
| NAD Salvage Pathway II                                      | Adult Female | 1.31 | 0.125  | NMRK2                       |
| Pyrimidine Deoxyribonucleotides De Novo Biosynthesis I      | Adult Female | 1.31 | 0.125  | AK1                         |



|       |          |            |             |             |              |                       |   |   |   |   |   |         |                                       |
|-------|----------|------------|-------------|-------------|--------------|-----------------------|---|---|---|---|---|---------|---------------------------------------|
| chr13 | 70546019 | 70546179 - | 9.25299E-07 | 0.000254788 | 13.2079849   | 80074 NM_001100640 -  | 0 | 0 | 1 | 0 | 0 | Lamc2   | laminin                               |
| chr14 | 7813906  | 7813983 +  | 6.20787E-08 | 2.61033E-05 | -12.10100945 | 49682 NM_001100789 -  | 0 | 0 | 1 | 0 | 0 | Ptpn13  | protein tyrosine phosphatase          |
| chr16 | 1910714  | 1910869 -  | 9.33035E-05 | 0.008189586 | 13.2185302   | -68322 NM_172243 +    | 0 | 0 | 1 | 0 | 0 | Ppif    | peptidylprolyl isomerase F            |
| chr16 | 1914604  | 1914814 -  | 8.61888E-05 | 0.007728322 | 10.78792264  | -64377 NM_172243 +    | 0 | 0 | 1 | 0 | 0 | Ppif    | peptidylprolyl isomerase F            |
| chr16 | 19931259 | 19931386 + | 0.001275097 | 0.04697358  | 10.10140029  | 10968 NM_198134 -     | 0 | 0 | 0 | 0 | 1 | Bst2    | bone marrow stromal cell antigen 2    |
| chr16 | 79568982 | 79569182 + | 0.00022502  | 0.015157432 | 12.2865783   | 102538 NM_001169141 - | 0 | 0 | 0 | 0 | 0 | Myom2   | myomesin 2                            |
| chr19 | 55492590 | 55492787 + | 0.00098327  | 0.040017619 | 18.3374571   | 17674 NM_001108453 -  | 0 | 0 | 1 | 0 | 1 | Cbfa2t3 | core-binding factor                   |
| chr20 | 12811318 | 12811397 + | 0.000155959 | 0.011789757 | 14.18176148  | 9070 NM_053567 -      | 0 | 0 | 1 | 0 | 0 | Ftcd    | formimidoyltransferase cyclodeaminase |
| chr20 | 12813635 | 12813725 + | 7.94379E-09 | 4.2125E-06  | 16.16679484  | 6742 NM_053567 -      | 0 | 1 | 1 | 0 | 0 | Ftcd    | formimidoyltransferase cyclodeaminase |
| chr20 | 12815648 | 12815823 + | 7.92049E-16 | 1.86243E-12 | 26.66627222  | 4644 NM_053567 -      | 0 | 0 | 1 | 0 | 0 | Ftcd    | formimidoyltransferase cyclodeaminase |

## Supplementary Data 2\_Fetal heart DEG

| Gene     | Locus                 | Value_1:      | Value_2:      | log2.fold_change | Test_stat | p_value | q_value    |
|----------|-----------------------|---------------|---------------|------------------|-----------|---------|------------|
|          |                       | Control group | Hypoxia Group |                  |           |         |            |
| Plagl1   | 1:7219586-7270169     | 33.1528       | 25.2696       | -0.39173         | -2.14675  | 0.0001  | 0.0141494  |
| Trdn     | 1:25403389-25787664   | 17.9915       | 25.4364       | 0.499576         | 2.67736   | 0.00005 | 0.00828487 |
| Atp1a3   | 1:81852424-81881549   | 30.7527       | 38.1546       | 0.311144         | 1.69098   | 0.00345 | 0.186463   |
| Csrp3    | 1:104147204-104166389 | 390.997       | 497.973       | 0.348909         | 1.89696   | 0.0006  | 0.0604464  |
| Spon1    | 1:178636620-178935061 | 11.0168       | 17.675        | 0.682009         | 3.32449   | 0.00005 | 0.00828487 |
| Hspa12a  | 1:279946810-280015362 | 2.84681       | 3.80402       | 0.418176         | 1.70811   | 0.0031  | 0.176644   |
| Hspb3    | 2:45517787-45518502   | 45.6136       | 58.4211       | 0.357023         | 1.59213   | 0.0053  | 0.236677   |
| Syt6     | 2:206064180-206119034 | 5.20391       | 2.53658       | -1.03671         | -2.68372  | 0.00005 | 0.00828487 |
| Myoz2    | 2:227180886-227207629 | 155.41        | 204.109       | 0.393254         | 2.16247   | 0.0001  | 0.0141494  |
| Plcb4    | 3:128601184-128971720 | 15.8385       | 23.2901       | 0.556283         | 2.80212   | 0.00005 | 0.00828487 |
| Kcnb1    | 3:163850784-163935610 | 2.0441        | 2.93355       | 0.521184         | 1.55109   | 0.0074  | 0.283247   |
| Dok5     | 3:168345116-168482445 | 9.70953       | 14.9944       | 0.626947         | 2.3574    | 0.0001  | 0.0141494  |
| Actr3b   | 4:5644286-5672708     | 3.70247       | 6.56952       | 0.827302         | 2.02004   | 0.0004  | 0.044577   |
| Grip2    | 4:123585230-123636040 | 1.24124       | 1.90162       | 0.615448         | 1.74172   | 0.00235 | 0.150221   |
| Slc25a26 | 4:126522334-126615402 | 9.54763       | 12.373        | 0.373984         | 1.57741   | 0.0065  | 0.264047   |
| Vwf      | 4:158085056-158219525 | 8.88935       | 10.9323       | 0.298452         | 1.60772   | 0.0055  | 0.242173   |
| Apold1   | 4:168752141-168755024 | 11.8774       | 7.83213       | -0.600743        | -2.63628  | 0.00005 | 0.00828487 |
| Polr1e   | 5:60572572-60588098   | 4.92624       | 7.452         | 0.59714          | 1.84982   | 0.00165 | 0.118734   |
| Rgs3     | 5:78429038-78567281   | 23.2895       | 18.2372       | -0.3528          | -1.79844  | 0.00195 | 0.132737   |
| Astn2    | 5:81179613-82168427   | 6.99893       | 10.0016       | 0.515025         | 1.85366   | 0.0019  | 0.130036   |
| Tlr4     | 5:82587423-82601056   | 1.34375       | 2.09013       | 0.637329         | 1.66574   | 0.0049  | 0.227696   |
| Slc2a1   | 5:138154676-138182897 | 63.1389       | 48.4072       | -0.383307        | -2.10832  | 0.0005  | 0.0511911  |
| Tmem51   | 5:160569078-160620659 | 12.4311       | 18.3203       | 0.55949          | 2.18085   | 0.00005 | 0.00828487 |
| Vwa1     | 5:173216736-173221923 | 3.72914       | 2.49361       | -0.580606        | -1.63569  | 0.00555 | 0.242678   |
| Mycn     | 6:38222553-38228406   | 10.7063       | 7.98738       | -0.422664        | -1.73666  | 0.00335 | 0.182626   |
| Ntsr2    | 6:41917093-41923780   | 10.4587       | 16.0679       | 0.619475         | 2.30491   | 0.00005 | 0.00828487 |
| Pygl     | 6:92597758-92643734   | 6.73137       | 4.51345       | -0.576668        | -2.09007  | 0.00045 | 0.0480242  |
| Ltbp2    | 6:108500113-108596638 | 2.28981       | 3.88386       | 0.762266         | 3.01189   | 0.00005 | 0.00828487 |
| Ckb      | 6:136142955-136145838 | 120.952       | 153.579       | 0.34455          | 1.80236   | 0.00145 | 0.10934    |
| Appl2    | 7:26256414-26306128   | 14.3174       | 10.184        | -0.49146         | -2.25875  | 0.00005 | 0.00828487 |
| Rcn2     | 8:60709850-60726938   | 24.0997       | 19.337        | -0.317653        | -1.53723  | 0.0079  | 0.290891   |
| Apoec2   | 9:14529217-14542731   | 110.684       | 90.9441       | -0.283401        | -1.54165  | 0.0076  | 0.287408   |
| Myh11    | 10:117715-1010029     | 10.4608       | 6.36098       | -0.717668        | -1.83772  | 0.0021  | 0.139922   |
| Jade2    | 10:37269131-37319850  | 1.97958       | 3.05242       | 0.624756         | 1.75627   | 0.0024  | 0.151116   |
| Hand1    | 10:43250728-43253296  | 7.11047       | 3.13786       | -1.18017         | -2.67013  | 0.00005 | 0.00828487 |
| Mmd      | 10:77755177-77783739  | 31.6541       | 40.8117       | 0.366589         | 1.94706   | 0.0007  | 0.0643438  |
| Cntnap1  | 10:89086555-89103615  | 12.7443       | 9.75881       | -0.38508         | -1.95081  | 0.0007  | 0.0643438  |
| Myl4     | 10:92628355-92638100  | 537.725       | 795.82        | 0.565572         | 2.8909    | 0.00005 | 0.00828487 |
| Ephb3    | 11:83527961-83546802  | 3.84309       | 5.2629        | 0.453592         | 1.74751   | 0.00265 | 0.161997   |
| Txnrd2   | 11:86667993-86735630  | 10.8621       | 7.20456       | -0.59232         | -1.59852  | 0.00675 | 0.26985    |
| Col26a1  | 12:22834828-22980603  | 7.64217       | 4.64032       | -0.71976         | -2.6206   | 0.00005 | 0.00828487 |
| Eln      | 12:24973455-25021864  | 29.4515       | 38.1566       | 0.373591         | 2.04252   | 0.00015 | 0.0188895  |
| Cxcr4    | 13:45314951-45318856  | 4.15594       | 6.41986       | 0.627366         | 1.86172   | 0.002   | 0.135409   |
| Lamc2    | 13:70566642-70632125  | 11.6045       | 14.5893       | 0.330228         | 1.72955   | 0.0026  | 0.160499   |
| Ptpn13   | 14:7688550-7863679    | 9.99573       | 12.2511       | 0.293524         | 1.5535    | 0.0066  | 0.265539   |
| Ppif     | 16:1979190-1985912    | 52.8147       | 64.5526       | 0.289536         | 1.53842   | 0.00775 | 0.290891   |
| Bst2     | 16:19938780-19942353  | 6.3283        | 10.0632       | 0.669198         | 1.67606   | 0.0045  | 0.216292   |
| Myom2    | 16:79587135-79672847  | 3.31042       | 7.67958       | 1.21401          | 5.00393   | 0.00005 | 0.00828487 |
| Cbfa2t3  | 19:55438408-55512131  | 4.72574       | 6.1055        | 0.369569         | 1.56013   | 0.0063  | 0.260118   |
| Ftcd     | 20:12806956-12820466  | 2.89925       | 0.978494      | -1.56705         | -2.99824  | 0.00005 | 0.00828487 |



## Supplementary Data 2\_Adult male heart DMR

| Chr   | Start     | End       | Strand | p-value     | q-value     | Methylation difference | Distance to feature | Feature name | Feature strand | Promoter | Exon | Intron | CpGi | Shores | Rn_Symbol | GENENAME                                                                     |
|-------|-----------|-----------|--------|-------------|-------------|------------------------|---------------------|--------------|----------------|----------|------|--------|------|--------|-----------|------------------------------------------------------------------------------|
| chr1  | 89368728  | 89368900  | +      | 0.001531328 | 0.036902496 | -10.48446709           | 1061                | NM_053469    | -              | 0        | 0    | 1      | 0    | 0      | Hamp      | hepcidin antimicrobial peptide                                               |
| chr1  | 128678188 | 128678262 | -      | 1.52161E-05 | 0.001241152 | 15.61768665            | 43787               | NM_001134858 | -              | 0        | 0    | 1      | 0    | 0      | Synm      | synemin                                                                      |
| chr1  | 128704296 | 128704483 | +      | 6.27584E-09 | 1.81065E-06 | -17.98470279           | 17566               | NM_001134858 | -              | 0        | 0    | 1      | 0    | 0      | Synm      | synemin                                                                      |
| chr4  | 62454117  | 62454246  | -      | 4.19025E-05 | 0.00270881  | -13.07198607           | -15160              | NM_001127298 | -              | 0        | 0    | 0      | 0    | 0      | Wdr91     | WD repeat domain 91                                                          |
| chr4  | 62459091  | 62459220  | -      | 4.39323E-06 | 0.000466244 | -13.39285714           | -20134              | NM_001127298 | -              | 0        | 0    | 0      | 0    | 0      | Wdr91     | WD repeat domain 91                                                          |
| chr4  | 109705599 | 109705656 | +      | 0.000327838 | 0.012778549 | -13.2789039            | -173366             | NM_173097    | -              | 0        | 0    | 0      | 0    | 0      | Reg3g     | regenerating islet-derived 3 gamma                                           |
| chr6  | 76268343  | 76268482  | +      | 3.15985E-06 | 0.000354759 | -14.47786132           | 1976                | NM_001105720 | -              | 0        | 1    | 0      | 0    | 1      | Nfkbia    | nuclear factor of kappa light polypeptide gene enhancer in B-cells inhibitor |
| chr10 | 76375382  | 76375542  | +      | 0.000781    | 0.023658677 | -10.83587655           | 31537               | NM_001009536 | +              | 0        | 0    | 0      | 0    | 0      | Trim25    | tripartite motif-containing 25                                               |
| chr13 | 47421718  | 47421886  | +      | 0.000803121 | 0.024150347 | -10.97654543           | 18797               | NM_001033964 | -              | 0        | 0    | 1      | 0    | 0      | Plkfb2    | 6-phosphofructo-2-kinase/fructose-2                                          |
| chr14 | 70119194  | 70119405  | +      | 0.000153615 | 0.007388653 | 15.46073507            | 2393                | NM_001011910 | -              | 0        | 0    | 1      | 0    | 1      | Lap3      | leucine aminopeptidase 3                                                     |
| chr15 | 32503004  | 32503178  | +      | 1.06419E-07 | 2.08812E-05 | -11.50201926           | 384756              | NM_138910    | -              | 0        | 0    | 0      | 0    | 0      | Dad1      | defender against cell death 1                                                |
| chr17 | 70848121  | 70848204  | +      | 0.001326776 | 0.033714946 | -12.78274414           | 163989              | NM_057135    | +              | 0        | 0    | 0      | 0    | 0      | Plkfb3    | 6-phosphofructo-2-kinase/fructose-2                                          |
| chr20 | 4541805   | 4541970   | +      | 0.000128341 | 0.006402104 | -10.03430838           | 104                 | NM_212466    | -              | 1        | 1    | 0      | 0    | 0      | Cfb       | complement factor B                                                          |
| chr20 | 5375243   | 5375320   | -      | 1.61243E-30 | 7.17742E-27 | 19.20775253            | 234                 | NM_001008829 | +              | 1        | 1    | 1      | 1    | 0      | RT1-A2    | RT1 class Ia                                                                 |

## Supplementary Data 2\_Adult male heart DEG

| Gene   | Locus                 | Value_1:      | Value_2:      | log2.fold_change | Test_stat | p_value | q_value  |
|--------|-----------------------|---------------|---------------|------------------|-----------|---------|----------|
|        |                       | Control group | Hypoxia Group |                  |           |         |          |
| Hamp   | 1:89368020-89369960   | 426.489       | 95.1376       | -2.16442         | -3.84261  | 0.00005 | 0.012172 |
| Synm   | 1:128692111-128722048 | 32.2224       | 23.0308       | -0.484496        | -1.41462  | 0.00215 | 0.252175 |
| Wdr91  | 4:62398072-62438958   | 6.55581       | 3.74528       | -0.807698        | -1.57717  | 0.0009  | 0.135021 |
| Reg3g  | 4:109521652-109559270 | 12.6869       | 31.478        | 1.311            | 2.37961   | 0.00005 | 0.012172 |
| Nfkbia | 6:76267226-76270457   | 64.2678       | 91.4896       | 0.509512         | 1.53819   | 0.00045 | 0.078458 |
| Trim25 | 10:76343846-76362159  | 20.7012       | 29.727        | 0.522056         | 1.53534   | 0.00085 | 0.132129 |
| Pfkfb2 | 13:47413452-47440682  | 10.6559       | 15.8225       | 0.570327         | 1.34867   | 0.0021  | 0.250872 |
| Lap3   | 14:70098578-70121797  | 41.4217       | 29.9196       | -0.469298        | -1.3733   | 0.0021  | 0.250872 |
| Dad1   | 15:32868135-32887933  | 145.44        | 106.169       | -0.454064        | -1.33515  | 0.00255 | 0.278814 |
| Pfkfb3 | 17:70632800-70713736  | 20.5404       | 9.41338       | -1.12568         | -2.55832  | 0.00005 | 0.012172 |
| Cfb    | 20:4536205-4542073    | 5.39138       | 11.5762       | 1.10243          | 2.084     | 0.00005 | 0.012172 |
| RT1-A2 | 20:5375010-5378536    | 43.4266       | 24.5263       | -0.824252        | -2.30234  | 0.00005 | 0.012172 |
